1 **Short Title:** Genetic Control of Transcript Levels in Tomato

2

3 **Corresponding author:**

4 Neelima R. Sinha

5 Department of Plant Biology

6 1002 Life Sciences

7 One Shields Ave.

8 Phone: (530) 754-8441

9 Fax: (530) 752-5410

10 e-mail: [nrsinha@ucdavis.edu](mailto:nrsinha@ucdavis.edu)

11

12 **Research area:** Genes, Development and Evolution

13

14

15

16

17

18

19

20

21

22

23

24

25 **Title: eQTL regulating Transcript Levels Associated with Diverse**  
26 **Biological Processes in Tomato**

27

28 Aashish Ranjan<sup>#a¶</sup>, Jessica M. Budke<sup>¶b</sup>, Steven D. Rowland<sup>¶</sup>, Daniel H.  
29 Chitwood<sup>#c</sup>, Ravi Kumar<sup>#d</sup>, Leonela Carriedo, Yasunori Ichihashi<sup>#e</sup>, Kristina  
30 Zumstein, Julin N. Maloof, and Neelima R. Sinha

31 Department of Plant Biology, University of California at Davis, Davis, California,  
32 United States of America

33

34 <sup>¶</sup>These authors contributed equally to this work.

35

36 **Summary:** The combined use of genetic mapping and transcript coexpression  
37 analysis was used to identify genetic hotspots that regulate transcript levels of  
38 genes linked to diverse biological processes.

39

40

41

42

43

44 **Footnotes:**

45 **Funding information:** This work is supported through a National Science  
46 Foundation grant (IOS-0820854) awarded to NRS and JNM. DHC was a fellow of  
47 the Life Sciences Research Foundation funded through the Gordon and Betty  
48 Moore Foundation. JMB is a recipient of Katherine Esau Postdoctoral Fellowship  
49 at UC Davis.

50 **Present Address:**

51 #<sup>a</sup> : National Institute of Plant Genome Research, New Delhi, India.

52 #<sup>b</sup> : Department of Ecology and Evolutionary Biology, University of Tennessee,  
53 Knoxville, Tennessee, United States of America.

54 #<sup>c</sup> : Donald Danforth Plant Science Center, St. Louis, Missouri, United States of  
55 America.

56 #<sup>d</sup> : Novozymes, Davis, California, United States of America.

57 #<sup>e</sup> : RIKEN Center for Sustainable Resource Science, Yokohama, Kanagawa,  
58 Japan.

59

60 **Corresponding author email:** nrsinha@ucdavis.edu

61

62

63

## 64 **Abstract**

65 Variation in gene expression, in addition to sequence polymorphisms, is known to  
66 influence developmental, physiological and metabolic traits in plants. Genetic  
67 mapping populations have facilitated identification of expression Quantitative  
68 Trait Loci (eQTL), the genetic determinants of variation in gene expression  
69 patterns. We used an introgression population developed from the wild desert-  
70 adapted *Solanum pennellii* and domesticated tomato *Solanum lycopersicum* to  
71 identify the genetic basis of transcript level variation. We established the effect of  
72 each introgression on the transcriptome, and identified ~7,200 eQTL regulating  
73 the steady state transcript levels of 5,300 genes. Barnes-Hut *t*-distributed  
74 stochastic neighbor embedding clustering identified 42 modules revealing novel  
75 associations between transcript level patterns and biological processes. The  
76 results showed a complex genetic architecture of global transcript abundance  
77 pattern in tomato. Several genetic hotspots regulating a large number of  
78 transcript level patterns relating to diverse biological processes such as plant  
79 defense and photosynthesis were identified. Important eQTL regulating transcript  
80 level patterns were related to leaf number and complexity, and hypocotyl length.  
81 Genes associated with leaf development showed an inverse correlation with  
82 photosynthetic gene expression but eQTL regulating genes associated with leaf  
83 development and photosynthesis were dispersed across the genome. This  
84 comprehensive expression QTL analysis details the influence of these loci on

85 plant phenotypes, and will be a valuable community resource for investigations

86 on the genetic effects of eQTL on phenotypic traits in tomato.

87

88

89

90

91

92

93

94

95

96

97

98

99

100

101

102

103

104

## 105 **Introduction**

106       The genetic basis of many qualitative and quantitative phenotypic  
107 differences in plants has been associated with sequence polymorphisms and the  
108 corresponding changes in gene function. However, differences in the levels of  
109 steady state transcripts, without underlying changes in coding sequences, also  
110 significantly influence plant phenotypes. Closely related plant species often have  
111 little coding sequence divergence, nonetheless the related species often develop  
112 unique physiological, metabolic, and developmental characteristics indicating that  
113 patterns of gene expression are important in species-level phenotypic variation  
114 (Kliebenstein, 2009; Koenig et al., 2013). Phenotypic differences attributed to  
115 variations in gene expression patterns have been found to influence disease  
116 resistance, insect resistance, phosphate sensing, flowering time, circadian  
117 rhythm, and plant development (Kroymann et al., 2003; Werner et al., 2005;  
118 Clark et al., 2006; Zhang et al., 2006; Svistoonoff et al., 2007; Chen et al., 2010;  
119 Hammond et al., 2011).

120       Global transcript level changes across precise genetic backgrounds have  
121 been used to define expression Quantitative Trait Loci (eQTL) by identifying  
122 genomic regions responsible for the variation in transcript levels (Jansen and  
123 Nap, 2001; Kliebenstein, 2009; Druka et al., 2010; Chitwood and Sinha, 2013).  
124 An eQTL is a chromosomal region that drives variation in gene expression  
125 patterns (i.e., steady state transcript abundance) between individuals of a genetic  
126 mapping population and can be treated as a heritable quantitative trait (Brem et

127 al., 2002; Kliebenstein, 2009; Cubillos et al., 2012). Depending upon the  
128 proximity to the gene being regulated, eQTL can be classified into two groups:  
129 *cis*-eQTL when the physical location of an eQTL coincides with the location of the  
130 regulated gene, and *trans*-eQTL when an eQTL is located at a different position  
131 from the gene being regulated (Kliebenstein, 2009). eQTL studies with the model  
132 plant *Arabidopsis* showed that *cis*-eQTL have a significant effect on local  
133 expression levels, whereas *trans*-eQTL often have global influences on gene  
134 regulation (DeCook et al., 2006; West et al., 2007; Holloway and Li, 2010).  
135 Global eQTL studies also identified *trans*-acting eQTL hotspots, which contain  
136 master regulators controlling the expression of a suite of genes that act in the  
137 same biological process or pathway. For example, eQTL hotspots in *Arabidopsis*  
138 co-locate with the *ERECTA* locus, which has been shown to pleiotropically  
139 influence many traits including those regulating morphology (Keurentjes et al.,  
140 2007). Similarly the rice *sub1* locus, which regulates submergence tolerance by  
141 controlling internode and leaf elongation, controls the activity of ethylene  
142 response factors with significant *trans* effects (Fukao et al., 2006). In addition, the  
143 eQTL identified using pathogen challenged tissues in barley were enriched for  
144 genes related to pathogen response (Chen et al., 2010; Druka et al., 2010). Thus  
145 eQTL analyses have the potential to reveal a genome-wide view of the complex  
146 genetic architecture of gene expression regulation, the underlying gene  
147 regulatory networks, and may also identify master transcriptional regulators.

148 Cultivated tomatoes, along with their wild-relatives, harbor broad genetic  
149 diversity and large phenotypic variability (Moyle, 2008; Ranjan et al., 2012).  
150 Wide interspecific crosses bring together divergent genomes and hybridization of  
151 such diverse genotypes leads to extensive gene expression alterations compared  
152 to either parent. Introgression lines (ILs), developed by crosses between wild-  
153 relatives and the cultivated tomato to bring discrete wild-relative genomic  
154 segments into the cultivated background, have proved to be a useful genetic  
155 resource for genomics and molecular breeding studies. These ILs may vary in  
156 the size of introgressed region that may range from a few genes to more than a  
157 thousand genes. ILs developed from the wild desert-adapted species *Solanum*  
158 *pennellii* and domesticated *Solanum lycopersicum* cv. M82 have proved to be a  
159 useful genetic resource (Eshed and Zamir, 1995; Liu and Zamir, 1999). This  
160 population has been successfully used to map numerous QTL for metabolites,  
161 enzymatic activity, yield, fitness traits, and developmental features, such as leaf  
162 shape, size, and complexity (Frary et al., 2000; Holtan and Hake, 2003; Fridman  
163 et al., 2004; Chitwood et al., 2013; Muir et al., 2014). Comparative  
164 transcriptomics for the two parents enabled identification of transcript abundance  
165 variation potentially underlying trait differences between species (Koenig et al.,  
166 2013). However, the genetic regulators of these transcriptional differences  
167 between the species still need to be elucidated. Therefore, we used a genomics  
168 approach in combination with statistical methods to identify the genetic basis of  
169 transcript level variation in tomato using the *S. pennellii* introgression lines.



170 Here we report on a comprehensive transcriptome profile of the ILs, a  
171 comparison between the transcript abundance patterns of the ILs and the  
172 cultivated M82 background (differential gene expression – DE), as well as a  
173 global eQTL analysis to identify patterns of genetic regulation of transcript  
174 abundance in the tomato shoot apex. We have identified more than 7,200 *cis*-  
175 and *trans*-eQTL in total, which regulate the transcript abundance of  
176 approximately 5,300 genes in tomato. Additional analyses using Barnes-Hut *t*-  
177 distributed stochastic neighbor embedding (BH-SNE) (van der Maaten, 2013)  
178 identified 42 modules revealing novel associations between transcript abundance  
179 patterns and biological processes. The transcript abundance patterns under  
180 strong genetic regulation are related to plant defense, photosynthesis, and plant  
181 developmental traits. We also report important eQTL regulating steady state  
182 transcript abundance pattern associated with leaf number, complexity, and  
183 hypocotyl length phenotypes.

184

## 185 **Results and Discussion**

### 186 **Transcriptome Profiling and Global eQTL analysis**

187 RNAseq reads obtained from the tomato shoot apex with developing  
188 leaves and hypocotyl were used to identify differentially expressed (DE) genes at  
189 the transcript level between each *S. pennellii* IL and the cultivated M82  
190 (Supplemental Dataset 1). The total number of genes differentially expressed for  
191 each IL both in *cis* (in this population reflecting “local” level regulation either from

192 within a gene itself or other genes in the introgression) and *trans*, along with the  
193 number of genes in the introgression regions, are presented in Figure 1 and  
194 Supplemental Table I. There was a strong correlation between the number of  
195 genes in the introgression regions and the number of DE genes in *cis*  
196 (Supplemental Figure S1A). In contrast, the number of DE genes in *trans* was  
197 poorly correlated with introgression size (Supplemental Figure S1B). For  
198 example, IL12.1.1, despite having one of the smallest introgressions, showed  
199 96% of ~500 DE genes regulated in *trans* (Supplemental Table I, Supplemental  
200 Figure S2). In contrast, IL1.1 and IL12.3, the ILs with highest number of genes in  
201 the introgression regions, showed smaller numbers of total and *trans* DE genes  
202 (Figure 1, Supplemental Table I, Supplemental Figure S2). These examples  
203 suggest that specific loci and not the introgression size determine gene  
204 regulation in *trans*. This could, in part, be due to the presence of genes encoding  
205 key transcription factors or developmental regulators in the regions with strong  
206 influence on transcript expression pattern as is seen in the *ERECTA* containing  
207 genomic region in Arabidopsis (Keurentjes et al., 2007). A total of 7,943 unique  
208 tomato genes were DE between the ILs and cv. M82, representing approximately  
209 one third of the ~21,000 genes with sufficient sequencing depth to allow DE  
210 analysis. 2,286 genes, more than one fourth of unique DE genes between the ILs  
211 and cv. M82, genes showed transgressive expression patterns, i.e. those genes  
212 were differentially expressed at the transcript level for the IL but not for *S.*  
213 *pennellii* compared to cv. M82 (Supplemental Dataset 2 and 3). These data

214 suggest that in addition to protein coding differences, transcriptional regulation of  
215 less than one third of all genes accounts for most of the phenotypic and trait  
216 differences between the ILs and the cultivated parent.

217 Identifying eQTL localized to subsets of the introgressions, based on  
218 overlaps between them, enabled us to narrow down the regions that contain the  
219 regulatory loci. This analysis brings us one step closer to identifying potential  
220 candidates that influence transcript abundance patterns in tomato. We identified  
221 7,225 significant eQTL (bins) involving 5,289 unique genes across the 74 ILs  
222 (Figure 2; Supplemental Dataset 4). These 7,225 significant eQTL (located in  
223 bins) were designated as *cis*, *trans*, or *chromo0* (unmapped transcripts) as  
224 defined in the methods and illustrated in Supplemental Figure S3, and either up  
225 or down based in increase or decrease in transcript levels. This correlation  
226 resulted in a total of 1,759 *cis*-up and 1,747 *cis*-down eQTL, 2,710 *trans*-up and  
227 920 *trans*-down eQTL, and 51 *chromo0*-up and 38 *chromo0*-down eQTL  
228 (Spearman's rho values, Supplemental Figure S4, Supplemental Table II). The  
229 majority of genes (over 4,000 out of 5,289) are under the regulation of a single  
230 eQTL (3,134 *cis*, 1,014 *trans*, and 19 *chromo0*; Supplemental Figure S5). This  
231 observation shows the predominance of *cis*-eQTL for genetic regulation of  
232 transcript abundance in the tomato ILs. Similar correlation between transcript-  
233 level variation and genome-wide sequence divergence within seven Arabidopsis  
234 accessions was reported to be due to *cis* control of a majority of the detected  
235 variation (Kliebenstein et al., 2006).

236           The number of genes regulated by eQTL showed large variation across  
237 bins. Bins on chromosomes 6, 8, and 4, such as 6B, 6C, 4D, 8A, and 8B, contain  
238 predominantly *trans*-eQTL (Supplemental Dataset 5). In contrast three bins, 1F,  
239 3I, and 8G, that each contains over 100 genes, have no significant *trans*- or *cis*-  
240 eQTL and are transcriptionally silent. As expected, bins containing over 100  
241 significant *cis*-eQTLs are scattered across the genome (Supplemental Dataset  
242 5). The abundance of *trans*-eQTL on chromosomes 4, 6, and 8 strengthens the  
243 idea of *trans*-eQTL hotspots controlling expression of a large number of  
244 transcripts, as reported in other organisms (Brem et al., 2002; Schadt et al.,  
245 2003). The resolution in this analysis is at the level of bin, and these significant  
246 eQTL likely map to a smaller number of genes within the bins. Functional  
247 classification of genes being regulated by these eQTL and phenotypic  
248 association with the relevant ILs was undertaken to glean insights into the identity  
249 of candidate genes in the bin.

250

### 251 **Clustering eQTL target genes into modules defined by transcript** 252 **abundance patterns**

253           In order to functionally categorize the eQTL regulated genes, Barnes-Hut  
254 *t*-distributed stochastic neighbor embedding (BH-SNE, van der Maaten, 2013)  
255 was performed on the 5,289 genes with eQTL to detect novel associations  
256 between transcript abundance patterns. This clustering resulted in 42 distinct  
257 modules containing 3,592 genes (Figure 3). Seventeen of these modules had

258 significant GO enrichment ( $p$ -value  $<0.05$ ) with each module consisting of  
259 transcript abundance patterns either predominately regulated by *cis*- or *trans*-  
260 eQTL (Supplemental Table III). To determine which ILs are important for module  
261 regulation, the median transcript abundance value of module genes for each IL  
262 was calculated and used to identify ILs with significantly altered module steady  
263 state transcript level.

264 Three modules were present in all mappings of the BH-SNE (van der  
265 Maaten and Hinton, 2008) determined through iterations of DBscan analysis and  
266 GO enrichment, and were designated as landmark modules (Figure 3B;  
267 Supplemental Figure S6; Supplemental Dataset 6; Supplemental Table III). The  
268 largest module had a GO enrichment for photosynthesis and related processes,  
269 and significant *trans*-eQTL scattered widely across the genome with no bin or IL  
270 identified as the primary regulating region (Figure 4B; Supplemental Figure S6A;  
271 Supplemental Dataset 6 and 7). The second landmark module was enriched for  
272 transcript abundance patterns with roles in defense, metabolism, and signaling  
273 with the majority of their *trans*-eQTL mapped to IL6.2 and 6.2.2 (Figure 4A;  
274 Supplemental Figure S6B; Supplemental Dataset 6 and 8). The third module,  
275 which is enriched for transcript abundance patterns with cysteine-type peptidase  
276 activity, was predominately composed of genes regulated by *cis*-eQTL on IL 4.2,  
277 4.3, and 4.3.2 (Bins 4E and 4F) (Figure 4C; Supplemental Figure S6C;  
278 Supplemental Dataset 6 and 9). A cluster of genes enriched for “peptidase  
279 regulation” also emerged from a transcriptome study of leaf development for

280 three tomato species; this cluster was uniquely associated with *S. pennellii*  
281 orthologs at the P5 stage of leaf development, indicating that this species has a  
282 unique pattern of gene expression, which involves peptidase regulation (Ichihashi  
283 et al., 2014) and may be related to leaf maturation and senescence processes  
284 (Diaz-Mendoza et al., 2014).

285

### 286 **Genetic regulation of transcriptional responses associated with plant** 287 **defense**

288 One of the landmark modules from the clustering analysis was enriched  
289 for transcript abundance patterns related to plant defense (Figure 3B;  
290 Supplemental Dataset 8). Therefore we explored the genetic basis of  
291 transcriptional changes associated with plant defense. IL6.2 and IL6.2.2, and  
292 associated bins 6B and 6C, in particular, influence of the transcriptional  
293 responses of genes associated with plant defense and signaling (Supplemental  
294 Dataset 1). The genes showing increased steady-state transcript levels in both  
295 ILs compared to cv. M82, as well as the genes regulated by the corresponding  
296 bins, show enrichment of the GO categories response to stress and stimulus, cell  
297 death, defense response, and plant-type hypersensitive response (Supplemental  
298 Dataset 10 and 11). Promoter enrichment analysis for these genes showed  
299 enrichment of a W-box promoter motif that is recognized by WRKY transcription  
300 factors and influences plant defense response (Supplemental Dataset 12 and 13)  
301 (Yu et al., 2001). Both the bins, in particular bin 6C, contain genes involved in

302 pathogen, disease, and defense response: such as *NBS-LLR resistance genes*,  
303 *WRKY transcription factors*, *Multidrug resistance genes*, *Pentatricopeptide*  
304 *repeat-containing genes*, *Chitinase*, and *Heat Shock Protein* coding genes. This  
305 transcriptional response in the ILs is also reflected in the morphology of IL6.2.2;  
306 the plants are necrotic and dwarfed ([http://tgrc.ucdavis.edu/pennellii\\_ils.aspx](http://tgrc.ucdavis.edu/pennellii_ils.aspx),  
307 Sharlach et al., 2013). Previously, a phenotypic study for the chromosome 6  
308 introgression, specifically a 190Kb region in bin 6C, in a pathogen (*Xanthomonas*  
309 *perforans*)/control experiment was shown to confer hypersensitive response in  
310 IL6.2 and 6.2.2 (Sharlach et al., 2013). Taken together, these findings suggest  
311 bins 6B and 6C contain master genetic regulators of plant defense response  
312 genes, though identification of the causal gene/s that influence many other genes  
313 in *trans* will need further genetic dissection of these bins.

314

### 315 **Genetic regulation of transcriptional responses associated with leaf** 316 **development**

317         Given the striking differences in leaf features between *Solanum pennellii*  
318 and cv. M82 that are manifested in many ILs (Chitwood et al., 2013), the IL  
319 population provides an excellent system for determining the extent of genetic  
320 regulation of genes controlling leaf development. Previous phenotypic and QTL  
321 analyses identified many ILs, such as IL4.3, IL8.1.5, IL8.1.1, and IL8.1, harboring  
322 loci regulating leaf and plant developmental traits (Holtan and Hake, 2003;  
323 Chitwood et al., 2013; Muir et al., 2014). IL4.3, which harbors loci with the largest

324 contribution to leaf shape and shows larger epidermal cell sizes (Chitwood et al.,  
325 2013), exhibited decreased steady-state transcript levels for many genes  
326 associated with cell division, such as Cyclin-dependent protein kinase regulator-  
327 like protein (CYCA2;3), Cyclin A-like protein (CYCA3;1), and F-box/LRR-repeat  
328 protein 2 SKP2A (Supplemental Dataset 1 and 10). In addition, genes showing  
329 differences in transcript levels in IL4.3 were enriched for the promoter motifs  
330 MSA (M-specific activators that are involved in M-phase specific transcription)  
331 and the E2F binding site (Supplemental Dataset 11). Genes with decreased  
332 transcript levels in ILs 8.1.5, 8.1.1, and 8.1, also included genes associated with  
333 leaf development and morphology, genes encoding WD-40 repeat family protein  
334 LEUNIG, Homeobox-leucine zipper protein PROTODERMAL FACTOR 2, and  
335 the transcription factor ULTRAPETALA (Supplemental Dataset 1 and 10; Abe et  
336 al., 2003; Cnops et al., 2004; Carles et al., 2005).

337 We, further, investigated the transcript expression dynamics of a set of  
338 literature-curated genes related to leaf development (Ichihashi et al., 2014)  
339 across the ILs and bins (Supplemental Dataset 14 and 15). A number of  
340 canonical leaf developmental genes such as *SHOOT MERISTEMLESS*  
341 (Solyc02g081120, *STM*), *GROWTH-REGULATING FACTOR 1* (*GRF1*,  
342 Solyc04g077510), *ARGONAUTE 10* (*AGO10*, Solyc12g006790), *BELL* (*BEL1*,  
343 Solyc08g081400), *LEUNIG* (Solyc05g026480) and *SAWTOOTH 1* (*SAW1*,  
344 Solyc04g079830) were differentially expressed at the transcript level in more  
345 than five ILs. At the level of bins, genes involved in leaf development were



346 regulated by eQTL scattered widely across the genome (Figure 4D). eQTL(bin)-  
347 regulation of leaf developmental genes for some of ILs, such as IL 2.1, 4.3, 5.4,  
348 8.1/8.1.1/8.1.5 and 9.1.2, showing strong leaf phenotypes is summarized in  
349 Supplemental Table IV. We then examined the location of literature-curated leaf  
350 developmental genes within the identified modules in the BH-SNE mapping  
351 (Figure 3). The highest number of literature-curated leaf developmental genes  
352 (108) was located in the photosynthesis module, whereas 19 of these genes  
353 were located in the leaf development module (Supplemental Figure S7B;  
354 Supplemental Dataset 16 and 17), suggesting a relationship between these two  
355 modules. Over one third of the transcript expression patterns in the leaf  
356 development module have significant eQTL that map to bins 4D, 8A, and 8B  
357 (5.4%, 16.2%, and 15.5%, respectively; Supplemental Dataset 18), suggesting  
358 that these bins contain important regulators of leaf development. This enrichment  
359 of eQTL for specific bins is also consistent with the strong leaf phenotypes for ILs  
360 4.3, 8.1, 8.1.1, and 8.1.5. Altogether DE, eQTL, and BH-SNE results indicate  
361 that while there is no obvious master regulatory bin for leaf developmental genes,  
362 many are under strong genetic regulation by eQTL distributed throughout the  
363 genome (Figure 4D). This observation underscores the highly polygenic  
364 regulation of leaf development (Chitwood et al., 2013) as multiple loci, residing in  
365 many different chromosomal locations, regulate the expression of key leaf-  
366 developmental genes at the transcriptional level.  
367

368 **Genetic regulation of transcriptional responses associated with**  
369 **photosynthesis**

370 Since photosynthesis GO terms were enriched for the largest module from  
371 the clustering analysis (Figure 3B) and there was a correlation between  
372 photosynthesis and leaf developmental modules (Supplemental Figure S7B), we  
373 examined the genetic regulation of photosynthetic genes by specific ILs and  
374 corresponding bins. Genes related to photosynthesis show increased transcript  
375 levels across 21 ILs distributed on all chromosomes except chromosome 5  
376 (Supplemental Dataset 10), showing multigenic regulation of photosynthetic  
377 traits. Many of these ILs, including 8.1.5, 8.1.1, 8.1 and 4.3, and associated bins  
378 showed regulation of genes linked to photosynthesis, chlorophyll biosynthesis,  
379 and response to light stimulus (Supplemental Dataset 10 and 11). This  
380 observation indicates that ILs may also differ from each other and from the  
381 cultivated M82 background in photosynthetic efficiency. However no studies, so  
382 far, have investigated the photosynthetic phenotype of these ILs.

383 To analyze the relationship between the leaf development and  
384 photosynthesis modules the median transcript abundance value of all genes in  
385 each module was compared resulting in a significant negative correlation ( $\text{adj } r^2$   
386 = 0.77; Figure 5). This analysis likely reflects the transition from leaf development  
387 to leaf maturation captured in our shoot meristem samples. The genes found in  
388 the leaf development module may promote developmental processes such as  
389 cell division and maintenance or meristematic potential, whereas the leaf

390 development related genes found in the photosynthesis module may act to  
391 suppress this process to allow for maturation of the leaf. The two modules had  
392 their most influential eQTL on bins 4D, 8A, and 8B (Supplemental Dataset 6;  
393 Supplemental Figure S7A), suggesting that leaf development and photosynthetic  
394 genes not only have transcript levels in opposition but also likely share common  
395 regulatory loci. This finding is consistent with the link between leaf development  
396 and photosynthesis that we established previously by meta-analysis of  
397 developmental and metabolic traits (Chitwood et al., 2013).

398

#### 399 **Dissection of identified eQTL to spatially- and temporally- regulated** 400 **development**

401 Since the eQTL study used shoot apices that includes the shoot apical  
402 meristem (SAM) and developing leaves, we resolved the detected eQTL to  
403 specific tissues and temporally-regulated development using previous gene  
404 expression data. We analyzed transcript abundance in laser micro-dissected  
405 samples representing the shoot apical meristem (SAM) + P0 (the incipient leaf)  
406 vs. the P1 (the first emerged leaf primordium) that represents transcript levels in  
407 the meristem (SAM) and the first differentiated leaf (P1) (Figure 6A). We also  
408 analyzed hand dissected samples of the SAM + P0-P4 vs. the P5 collected over  
409 time (Figure 6B-C), representing genes regulated by vegetative phase change  
410 (heteroblasty) (Chitwood et al., 2015).

411 Using a bootstrapping approach, we identified bins statistically enriched  
412 for genetically regulating genes with previously identified transcript expression  
413 patterns (Figure 6D-F). Except for one instance (cis-regulated genes with high  
414 SAM/P0 expression located in bin 2I), bins enriched for transcript expression  
415 patterns represented *trans* regulation, hinting at predominant regulation of gene  
416 expression patterns mediated by transcription factors at the level of transcription.  
417 Most SAM/P0 vs. P1 enriched bins were enriched for P1 transcript expression  
418 (Figure 6D). We previously showed that genes with high P1 transcript levels are  
419 enriched for photosynthetic-related GO terms, compared to SAM/P0 genes  
420 enriched for transcription, cell division, and epigenetics-related GO terms  
421 (Chitwood et al., 2015), suggesting a genetic basis at both a functional and  
422 tissue-specific level for genes related to photosynthesis expressed preferentially  
423 in the P1 compared to the SAM/P0.

424 Bins enriched for regulation of genes with temporally-dependent steady  
425 state transcript levels were mostly associated with genes with decreasing  
426 transcript level over time, for both the SAM + P0-P4 and P5 (Figure 6E-F).  
427 Interestingly, 3 bins (7E, 7F, and 8A) share enrichment for genes with decreasing  
428 transcript levels over time in both the SAM + P0-P4 and P5 (Figure 6E-F),  
429 suggesting true temporal *trans* regulation, regardless of tissue, by these loci.  
430 Broadly, genes with increasing transcript levels over time are associated with  
431 transcription and small RNA GO terms in both the SAM + P0-P4 and P5,  
432 whereas decreasing transcript levels over time is associated with translation

433 associated GO terms in the SAM + P0-P4 and photosynthetic activity in the P5  
434 (Supplemental Dataset 19).

435

### 436 **Linking leaf and hypocotyl phenotypes to detected eQTL**

437 In order to connect detected eQTL with leaf and hypocotyl phenotypes  
438 under two different environmental conditions, we correlated transcript abundance  
439 with leaf number, leaf complexity (as measured in Chitwood et al., 2014), and  
440 hypocotyl length phenotypes of the ILs grown under simulated sun and shade  
441 conditions. Significant correlations with transcript abundance patterns were  
442 identified for all three phenotypes analyzed under both treatments (Supplemental  
443 Table V). Focusing on a subset of these transcript expression patterns that had  
444 associated eQTL enabled us to connect the phenotypes to their regulatory loci  
445 (Supplemental Table V).

446 Genes negatively correlated with leaf number showed enrichment of leaf  
447 development GO terms, whereas positively correlated genes showed enrichment  
448 of photosynthesis-related GO terms (Supplemental Figure S8A-B; Supplemental  
449 Dataset 2 in Chitwood et al., 2014). For the leaf complexity trait, correlations  
450 were reversed compared to leaf number (Supplemental Figure S9A-B;  
451 Supplemental Dataset 20). The transcript levels of these genes associated with  
452 leaf number were predominantly regulated by eQTL on chromosomes 7 and 8  
453 (Supplemental Figure S8C-D), and those of leaf complexity on chromosomes 4,  
454 7, and 8 (Supplemental Figure S9C-D). These results, in combination with DE,

455 eQTL, and BH-SNE, highlight bins on chromosomes 4 and 8 as important genetic  
456 regulators of leaf developmental genes.

457 Five genes were positively correlated with hypocotyl length under  
458 simulated shade and one gene (Solyc10g005120) was negatively correlated with  
459 hypocotyl length under both sun and shade (Figure 7A; Supplemental Dataset  
460 21). eQTL for the positively correlated genes are located on chromosomes 3, 7,  
461 and 11, whereas the single cis-eQTL for the negatively correlated gene,  
462 Solyc10g005120 (an uncharacterized *Flavanone 3-hydroxylase-like* gene), was  
463 located in bin 10A.1 (Supplemental Figure S10; Figure 7B). The transcript is only  
464 expressed in IL 10.1, which has the *S. pennellii* version of the gene and an  
465 attenuated shade avoidance response, but is not expressed in IL 10.1.1, which  
466 has the M82 version of the gene and a normal shade avoidance response  
467 (Supplemental Figure S11). This indicates that genes in bin 10A, the non-  
468 overlapping regions of 10.1 and 10.1.1, are responsible for the shade avoidance  
469 response. Bin 10A includes Solyc10g005120, the one gene negatively correlated  
470 with hypocotyl length under both sun and shade. .

471 A set of BILs (Backcross Inbred Lines), developed from cv. M82 and *S.*  
472 *pennellii*, provide higher resolution gene mapping with smaller bin sizes (Muller et  
473 al., 2016; Fulop et al., 2016). To further explore the role of Solyc10g005120 we  
474 used BIL-128, which contains a sub-region of bin 10A and has a secondary  
475 introgression on chromosome 2 (Supplemental Figure S10). Influence of the  
476 secondary introgression was examined using BIL-033, which-shares the

477 introgression on chromosome 2. BIL-128 has an attenuated shade avoidance  
478 response, as does 10.1, whereas BIL-033 undergoes a shade avoidance  
479 response similar to that of cv. M82 (Supplemental Figure S11). These results rule  
480 out the influence of chromosome 2 genes on the attenuated hypocotyl phenotype  
481 and confirm the influence of the bin 10A sub-region, which includes  
482 Solyc10g005120, on the attenuated hypocotyl phenotype (Supplemental Figure  
483 S10; S11). Solyc10g005120 is an uncharacterized gene and our observations  
484 highlight it as a new candidate regulating shade avoidance responses.

485

## 486 **Conclusion**

487 In this study we have investigated the regulation of steady state transcript  
488 levels in the progeny of crosses between cultivated tomato (*Solanum*  
489 *lycopersicum* cv. M82) and a wild relative (*Solanum pennellii*). A combination of  
490 differential gene expression, eQTL, and clustering analyses provide a  
491 comprehensive picture of genetic regulation of transcript expression patterns in  
492 this IL population. Our data show that some biological pathways, such as plant  
493 defense, are under the regulation of a limited number of loci with strong effects,  
494 whereas loci regulating other pathways, such as photosynthesis and leaf  
495 development, are scattered throughout the genome most likely with weaker  
496 individual effects. We correlated transcript levels with leaf and hypocotyl  
497 phenotypes and identified the regulatory regions driving these transcript  
498 expression patterns. Coupled with comprehensive phenotyping on these ILs,

499 these data set provide a valuable resource to design strategies to achieve a  
500 desirable plant phenotype through genetic manipulation of the transcript  
501 abundance of key genes or gene modules. Our ability to predict and understand  
502 the downstream effects of genes introgressed from wild relatives on gene  
503 expression patterns and ultimately phenotypes will be a critical component of  
504 crop plant enhancement.

505

## 506 **Materials and Methods**

### 507 **Plant Materials, Growth Conditions, and Experimental Design**

508 Plant materials, growth conditions, and experimental design were described in  
509 (Chitwood et al., 2013), but are outlined here briefly. Seeds of *Solanum pennellii*  
510 ILs (Eshed and Zamir, 1995; Liu and Zamir, 1999) and *Solanum lycopersicum* cv.  
511 M82 were obtained either from Dani Zamir (Hebrew University, Rehovot, Israel)  
512 or from the Tomato Genetics Resource Center (University of California, Davis).  
513 Seeds were stratified in 50% bleach for 2 min., grown in darkness for 3 d for  
514 uniform germination before moving to a growth chambers for 5 days. Six  
515 seedlings of each genotype were planted per pot for each replicate. The 76 ILs  
516 (and two replicates each of cv. M82 and *S. pennellii*) were divided into four  
517 cohorts of 20 randomly assigned genotypes. These cohorts were placed across  
518 four temporal replicates in a Latin square design as described in (Chitwood et al.,  
519 2013). The seedlings were harvested 5 d after transplanting (13 d of growth in  
520 total). Cotyledons and mature leaves >1 cm in total length were excluded, and



521 remaining tissues (including the shoot apical meristem) above the midpoint of the  
522 hypocotyl were pooled, for all individuals in a pot, into 2-mL microcentrifuge tubes  
523 and immediately frozen in liquid nitrogen. Two ILs, IL7.4 and IL12.4.1 were not  
524 included in the final analysis due to seed contaminations.

525

### 526 **Growth conditions and quantification of hypocotyl length**

527 Seeds 76 ILs (covering the entire genome) along with the parents were  
528 sterilized using 70% ethanol, followed by 50% bleach, and finally rinsed with  
529 sterile water. This experiment was replicated three times each in 2011 and 2012.  
530 Ten to twelve seeds of each IL were sown into Phytatray II (Sigma-Aldrich)  
531 containers with 0.5x Murashige and Skoog minimal salt agar. Trays were  
532 randomized and seeds germinated in total darkness at room temperature for 48h.  
533 Trays of each IL were randomly assigned to either a sun or shade treatment  
534 consisting of 110 $\mu$ Mol PAR with a red to far-red ratio of either 1.5 (simulated sun)  
535 or 0.5 (simulated shade) at 22°C with 16 hour light / 8 hour dark cycles for 10d.  
536 Three genotypes were excluded from the analyses due to poor germination  
537 (IL3.3) or their necrotic dwarf phenotypes (IL6.2, 6.2.2). After 10d, seedlings were  
538 removed from the agar and placed onto transparency sheets containing a  
539 moistened kimwipe to prevent dehydration and scanned using an Epson V700 at  
540 8-bit grayscale at 600 dpi. Image analysis was carried out using the software  
541 ImageJ (Abramoff et al., 2004).

542 For hypocotyl length analysis of backcross inbred lines between *S.*  
543 *pennellii* and *S. lycopersicum* cv. M82, seeds were sterilized in 50% bleach and  
544 then rinsed with sterile water. The seeds were then placed in Phytatrays in total  
545 dark at room temperature for 72 hours, and then moved to 16 hour light / 8 hour  
546 dark for 4d. Seedlings were transferred to soil using a randomized design and  
547 assigned to either a sun or shade treatment (as described above) for seven days.  
548 Images were taken with a HTC One M8 Dual 4MP camera and hypocotyl lengths  
549 measured in ImageJ (Abramoff et al., 2004) using the Simple Neurite Tracer  
550 (Longair et al., 2011) plugin.

551

#### 552 **RNA-Seq Library Preparation and Preprocessing RNA-Seq Sequence Data**

553 RNAseq libraries were prepared and the reads were preprocessed as described  
554 in (Chitwood et al., 2013), and are outlined here. mRNA isolation and RNA-Seq  
555 library preparation were performed from 80 samples at a time using a high-  
556 throughput RNA-Seq protocol (Kumar et al., 2012). The prepared libraries were  
557 sequenced in pools of 12 for replicates 1 and 2 (one lane each) and in pools of  
558 80 for replicates 3 and 4 (seven lanes) at the UC Davis Genome Centre  
559 Expression Analysis Core using the HiSeq 2000 platform (Illumina).  
560 Preprocessing of reads involved removal of low quality reads (phred score < 20),  
561 trimming of low-quality bases from the 39 ends of the reads, and removal of  
562 adapter contamination using custom Perl scripts. The quality-filtered reads were  
563 sorted into individual libraries based on barcodes and then barcodes were

564 trimmed using custom Perl script.

565

## 566 **Read Mapping and Quantification of Transcript Levels**

567 Mapping and normalization were done on the iPLANT Atmosphere cloud server

568 (Goff et al., 2011). *S. lycopersicum* reads were mapped to 34,727 tomato cDNA

569 sequences predicted from the gene models from the ITAG2.4 genome build

570 (downloadable from

571 [ftp://ftp.solgenomics.net/tomato\\_genome/annotation/ITAG2.4\\_release/](ftp://ftp.solgenomics.net/tomato_genome/annotation/ITAG2.4_release/)). A

572 pseudo reference list was constructed for *S. pennellii* using the homologous

573 regions between *S. pennellii* scaffolds v.1.9 and *S. lycopersicum* cDNA

574 references above. Using the defined boundaries of ILs, custom R scripts were

575 used to prepare IL-specific references that had the *S. pennellii* sequences in the

576 introgressed region and *S. lycopersicum* sequences outside the introgressed

577 region. The reads were mapped using BWA (Li and Durbin, 2009; Roberts and

578 Pachter, 2013) using default parameters except for the following that were

579 changed: `bwa aln: -k 1 -l 25 -e 15 -i 10` and `bwa samse: -n 0`. The bam alignment

580 files were used as inputs for `express` software to account for reads mapped to

581 multiple locations (Roberts and Pachter, 2013). The estimated read counts

582 obtained for each gene for each sample from `express` were treated as raw counts

583 for differential gene expression analysis. The counts were then filtered in R using

584 the Bioconductor package `EdgeR` version 2.6.10 (Robinson and Oshlack, 2010)

585 such that only genes that had more than two reads per million in at least three of

586 the samples were kept. Normalization of read counts was performed using the  
587 trimmed mean of M-values method (Robinson and Oshlack, 2010), and  
588 normalized read counts were used to identify genes that are differentially  
589 expressed at the transcript level in each IL compared to cv. M82 parent as well  
590 as in between two parents, *S. pennellii* and M82. The DE genes for each IL were  
591 compared to those between the two parents to identify genes that were  
592 differentially expressed for the IL but not for *S. pennellii* compared to cv. M82.  
593 Those genes were considered to show transgressive expression pattern at the  
594 transcript level for the specific IL, whereas other DE genes were considered to  
595 show the transcript expression similar to *S. pennellii*.

596

### 597 **Correlation of phenotype with pattern of steady state transcript levels**

598 Transcript level patterns were correlated with three phenotypes collected  
599 from the ILs along with the parents. Normalized estimated read counts with 3-4  
600 independent replicates per IL were log<sub>2</sub> transformed prior to the analyses. Leaf  
601 number and leaf complexity were collected from the ILs as outlined in Chitwood  
602 et al. (2014) under both sun and shade treatments. Hypocotyl lengths were  
603 measured as detailed above. To test whether the transcript level for a given gene  
604 was correlated with a particular phenotype, bootstrapping analyses were  
605 performed. Transcript levels and phenotype data were randomly permuted (with  
606 replacement) using the sample() function against IL and then merged. For each  
607 analysis, 1000 replications were performed and the p-values were calculated

608 from the Spearman's rho value distributions. P-values were adjusted for multiple  
609 comparisons using the BH correction (Benjamini & Hochberg, 1995). Significant  
610 correlations were identified as those with an adjusted p-value < 0.05 and the  
611 mean rho value (the correlation coefficient) was used to designate the correlation  
612 as either positive (positive slope) or negative (negative slope). All analyses were  
613 implemented using the statistical software R and custom scripts (R Core Team,  
614 2015).

615

#### 616 **Methods for eQTL Analyses**

617 eQTL mapping analyses were performed to determine whether the transcript  
618 level of a gene is correlated with the presence of a specific introgression from *S.*  
619 *pennellii* into *S. lycopersicum* cv. M82. This correlation was examined at the level  
620 of "bin", with a bin defined as a unique overlapping region between  
621 introgressions. Examining eQTL at the bin level enables those eQTL to be  
622 mapped to considerably smaller intervals than the ILs themselves (Liu and Zamir,  
623 1999). eQTL mapping analyses were performed on the normalized estimated  
624 read counts with 3-4 independent replicates per IL, which were log2 transformed  
625 prior to the analyses. To test whether the transcript level for a given gene is  
626 correlated with the presence of a particular bin, a Spearman's rank correlation  
627 test was used with ties resolved using the midrank method. P-values were  
628 adjusted for multiple comparisons using the BH correction (Benjamini and  
629 Hochberg, 1995). Significant eQTL were identified as those with an adjusted p-

630 value  $< 0.05$  and Spearman's rho (the correlation coefficient) was used to  
631 designate the eQTL as up (positive slope) or down (negative slope). Significant  
632 eQTL were also designated as *cis* (defined as local gene regulation within the  
633 same bin) - if the gene was located on the bin with which it is correlated, *trans*  
634 (distant) - if the gene was correlated with a bin that is neither the bin it is on nor a  
635 bin that shares an overlapping IL with the correlated bin, or *chromo0* - if the gene  
636 lies in the unassembled part of the genome. When a gene has a designation *cis*-  
637 eQTL, and a secondary correlation was found with a bin that shares an  
638 overlapping introgression, this secondary correlation was not designated as an  
639 eQTL. When a gene does not have a designated *cis*-eQTL and a correlation was  
640 found with a bin that shares an overlapping introgression, this correlation was  
641 designated as a *trans*-eQTL. All analyses were implemented using the statistical  
642 software R and custom scripts (R Core Team, 2015).

643

#### 644 **Methods for eQTL clustering analysis**

645 **Data Preparation:** In preparation for analysis using the Barnes-Hut-SNE  
646 algorithm, the data set was log<sub>2</sub> transformed. The transcript level for each gene  
647 was then normalized across all 74 introgression lines so that the profile had a  
648 mean of zero and a standard deviation of one. Normalization of the data allowed  
649 for comparison of the relative relationship between each gene expression profile  
650 (Bushati et al., 2011).

651 **Barnes-Hut-SNE:**  $t$ -SNE or  $t$ -distributed stochastic neighbor embedding (van  
652 der Maaten and Hinton, 2008) is a non-linear dimensionality reduction method,  
653 which faithfully maps objects in high dimensional space (H-space) into low  
654 dimensional space (V-space). Crowding is avoided through the long-tailed  $t$ -  
655 distribution, which forces non-neighbor clusters farther away from each other in  
656 V-space than those clusters actually are in H-space (van der Maaten and Hinton,  
657 2008). The exaggerated separation of non-neighboring clusters improves 2D  
658 resolution, allowing identification of novel groupings not readily apparent in other  
659 clustering methods. However this method is resource intensive, and with higher  
660 dimensionality, the number of genes that can be analyzed is limited. We have  
661 used Barnes-Hut-SNE, a newer implementation of  $t$ -SNE that greatly increases  
662 the speed and number of genes that can be analyzed, for the present analysis  
663 (van der Maaten, 2013). Barnes-Hut-SNE accomplishes this efficiency through  
664 the use of a Vantage Point tree and a variant of the Barnes-Hut algorithm (van  
665 der Maaten, 2013). For clustering, 2D maps were generated using a perplexity of  
666 30 and without the initial PCA step from the Barnes-Hut-SNE R implementation  
667 (Rtsne package; Krijthe, 2014). Theta was set to 0.3 based on (van der Maaten,  
668 2013) in order to maintain an accurate dimensionality reduction without  
669 sacrificing processing speed.

670 **Clustering for Module Selection:** The DBscan algorithm (Density Based spatial  
671 clustering of applications with noise) was used to select modules from the  
672 Barnes-Hut-SNE results (fpc package; Hennig, 2014). This algorithm had the

673 advantage of both selecting modules and removing any genes that fell between  
674 modules. The scanning range (*epsilon*) and minimum seed points (*minpts*) were  
675 selected manually, and used to determine if any one point is a member of a  
676 cluster based on physical positioning within the mapping relative to neighboring  
677 points. A *minpts* of 25 was used to capture smaller modules on the periphery and  
678 an *epsilon* of 2.25 was used to avoid the overlapping of internal and closely  
679 spaced modules.

680 **Plots:** Boxplots were generated from normalized transcript abundance values for  
681 each module. The ribbon plot was generated from correlated abundance values  
682 from leaf development and photosynthesis related modules. These plots were  
683 generated using ggplot from the ggplot2 R Package (Wickham, 2009). The  
684 median transcript levels of the genes mapped to a module was calculated for  
685 each IL and replicated for all modules. Significant ILs were identified as those  
686 with a median transcript level greater than 1 standard deviation from the mean of  
687 all genes across all ILs in the module.

688

### 689 **GO Enrichment analysis**

690 Differentially expressed genes at the transcript level for individual ILs and genes  
691 with significant eQTL were analyzed for enrichment of Gene Ontology (GO)  
692 terms at a 0.05 false discovery rate cutoff (goseq Bioconductor package; Young  
693 et al., 2010).

694



695 **Promoter enrichment analysis**

696 Promoter enrichment analysis was performed by analyzing the 1000 bp upstream  
697 of the ATG translational start site for genes with significant eQTL using 100  
698 motifs represented in the AGRIS AtTFDB (<http://arabidopsis.med.ohio->  
699 [state.edu/AtTFDB](http://arabidopsis.med.ohio-state.edu/AtTFDB)). The Biostrings package was used to analyze the abundance  
700 of 100 motifs in groups of genes with significant eQTL compared to motif  
701 abundance in promoters of all analyzed genes using a Fisher's exact test ( $p <$   
702  $0.05$ ) with either zero or one mismatch (Ichihashi et al., 2014).

703

704 **Dissection of eQTL to different stages and time of development at shoot**  
705 **apex**

706 Differentially expressed genes with enriched transcript levels in laser micro-  
707 dissected SAM/P0 vs. P1 samples or hand-dissected samples of the SAM + P0-  
708 P4 or P5 sampled over developmental time were obtained from Chitwood et al.,  
709 2015. Genes for which a differential expression call could be made (i.e., had  
710 enough reads and passed quality filters) were merged with detected eQTL using  
711 the `merge()` function in R (R Core Team, 2015). For bootstrapping, *cis*- and *trans*-  
712 regulated transcripts were analyzed separately. Merged transcript abundance  
713 patterns were randomly permuted (without replacement) using the `sample()`  
714 function against bin identity. For each test, 10,000 permutations were sampled to  
715 count the times that a particular transcript expression pattern was assigned to a  
716 bin more than the actual count. Resulting frequencies, representing a probability

717 value, were multiple test adjusted using the Benjamini-Hochberg (Benjamini and  
718 Hochberg, 1995) method using `p.adjust()`. Those bins with multiple test adjusted  
719 probability values  $<0.05$  were analyzed further using visualizations created with  
720 `ggplot2` (Wickham, 2009).

721

## 722 **Sequence submission**

723 The quality filtered, barcode-sorted and trimmed short read dataset, which was  
724 used to get the normalized read counts and for differential gene expression  
725 analysis, was deposited to the NCBI Short Read Archive under accessions  
726 SRR1013035 - SRR1013343 (Bioproject accession SRP031491).

727

## 728 **Supplemental files**

729

### 730 **Supplemental figures:**

731 **Supplemental Figure S1. Number of genes in the introgression region for**  
732 **an IL and the number of differentially expressed genes at the transcript**  
733 **level compared to cv. M82.** Strong correlation was observed for differentially  
734 expressed genes in *cis* (A), whereas a weak correlation was observed for genes  
735 in *trans* (B).

736

737 **Supplemental Figure S2. Histograms for differentially expressed genes at**  
738 **the transcript level for the ILs.** Genes with increased or decreased transcript  
739 levels for the ILs in *cis* (A), and in *trans* (B).

740

741 **Supplemental Figure S3. eQTL and the transcript abundance patterns they**  
742 **regulate.** Each blue bar is a unique introgression. When the transcript  
743 abundance pattern of gene 1 is correlated with bin-A, then bin-A contains a *cis*-  
744 eQTL. When the transcript abundance pattern of gene 1 is correlated with bin-E  
745 then bin-E contains a *trans*-eQTL. When gene 2 has a *cis*-eQTL designated for  
746 bin-D and the transcript abundance pattern of gene 2 is also correlated with bin-  
747 B, then this secondary correlation is not designated as an eQTL, since these bins  
748 share overlapping introgression regions. When the transcript abundance pattern  
749 of gene 2 is correlated with bin-B and gene 2 does not have a *cis*-eQTL  
750 designated for bin-D, then bin-B is designated as a *trans*-eQTL. All eQTLs for  
751 genes that lie in the unassembled portion of the genome (not on any  
752 chromosome) cannot be designated as either *cis* or *trans* and are designated  
753 *chromo0*-eQTL.

754

755 **Supplemental Figure S4. *Cis*- and *Trans*-eQTL.** Histograms plotting the  
756 numbers of significant eQTL mapped to each bin across the 12 chromosomes of  
757 *S. lycopersicum* (M82). A. *cis*-eQTLs. B. *trans*-eQTLs.

758

759 **Supplemental Figure S5. Frequency and distribution of differentially**  
760 **expressed genes at the transcript level for the IL population at the**  
761 **introgression and the bin level.** (A) Frequency of genes differentially expressed

762 in one or more ILs. (B) Frequency of genes being regulated by one or more  
763 BINs/eQTL.

764

765 **Supplemental Figure S6. Boxplots of the normalized transcript levels for**  
766 **the three landmark modules.** The relative transcript levels of all genes found in  
767 each module for the 74 ILs. The y-axis is the relative transcript level of all eQTL  
768 for each IL. (A) Photosynthesis module. (B) Defense, metabolism, and signaling  
769 module. (C) Cysteine-type peptidase activity module. Asterisks represent ILs with  
770 a median transcript level significantly different from the module mean.

771

772 **Supplemental Figure S7. Normalized transcript levels of the leaf**  
773 **development module and genes associated with leaf development within**  
774 **the mapping.** (A) Boxplot of normalized transcript level for the leaf development  
775 module. The 108 genes contained in the leaf development module and their  
776 relative median transcript level for each IL. Asterisks represent ILs with a median  
777 transcript levels significantly different from the module mean. (B) Literature-  
778 curated genes related to leaf development (Ichihashi et al., 2014) overlaid on the  
779 Leaf Development and Photosynthesis modules. False colored orange, dark  
780 blue, and light blue respectively.

781

782 **Supplemental Figure S8. eQTL regulation of transcript abundance patterns**  
783 **that correlate with leaf number.**

784 A, B) Forty-two distinct modules identified by DBscan from the eQTL mapping  
785 generated by BH-SNE analysis. Modules enriched for genes with leaf  
786 development and photosynthesis GO terms are labeled in blue and green,  
787 respectively. Genes with transcript levels correlated with leaf number under  
788 simulated sun (A) and shade (B) are indicated by squares with positive  
789 correlations in red and negative correlations in yellow.

790 C, D) Genes with transcript levels correlated with leaf number under simulated  
791 sun (C) and shade (D) are shown connected to their respective eQTL with  
792 chords. I) The 12 tomato chromosomes in megabases. II) Colored boxes indicate  
793 the sizes of each bin. III) Black bars indicate the locations of the genes. IV)  
794 Chords connect eQTL to the genes whose transcript levels they regulate. Chords  
795 are colored by the chromosome location of the eQTL.

796

797 **Supplemental Figure S9. eQTL regulation of transcript abundance patterns**  
798 **that correlate with leaf complexity.**

799 A, B) Forty-two distinct modules identified by DBscan from the eQTL mapping  
800 generated by BH-SNE analysis. Modules enriched for genes with leaf  
801 development and photosynthesis GO terms are labeled in blue and green,  
802 respectively. Genes with transcript levels correlated with leaf complexity under  
803 simulated sun (A) and shade (B) are indicated by squares with positive  
804 correlations in red and negative correlations in yellow.

805 C, D) Genes with transcript levels correlated with leaf complexity under simulated  
806 sun (C) and shade (D) are shown connected to their respective eQTL with  
807 chords. I) The 12 tomato chromosomes in megabases. II) Colored boxes indicate  
808 the sizes of each bin. III) Black bars indicate the locations of the genes. IV)  
809 Chords connect eQTL to the genes whose transcript levels they regulate. Chords  
810 are colored by the chromosome location of the eQTL.

811

812 **Supplemental Figure S10. Distributions of introgressions from *S. pennellii***  
813 **into *S. lycopersicum* cv. M82.** Map of chromosomes 2, 10, and 11 showing the  
814 locations of the introgressions for BIL 033 and 128, as well as the overlapping IL  
815 regions, which define the bind (Modified from Chitwood et al., 2013).

816

817 **Supplemental Figure S11. Tomato hypocotyl length under sun and shade**  
818 **treatments.** M82 shows a typical shade response with a significantly longer  
819 hypocotyl in the shade ( $\Delta$  of 7 mm). IL 10.1 and BIL 128, which share an  
820 overlapping introgression (**Supplemental Fig. S10**), do not significantly respond  
821 to the shade treatments. The presence of a response in BIL 033 in combination  
822 with the shared introgression with BIL 128 on chromosome 2, indicates that the  
823 gene region responsible for the lack of shade response in BIL 128 is located in  
824 the introgression on chromosome 10. Bars represent means  $\pm$  SE with a  
825 minimal of  $N = 22$  for each (ANOVA,  $F_{7,182} = 44.6$ ,  $p < 0.001$ ). Letters indicate  
826 differences at the  $p < 0.05$  significance level for Tukey pairwise tests.

827

828 **Supplemental tables:**

829 **Supplemental Table I. Number of differentially expressed (DE) genes at the**  
830 **transcript level in *cis*, *trans*, and the total number of DE genes for the ILs**  
831 **along with number of genes in the introgression region.**

832

833 **Supplemental Table II. Correlation coefficients (Spearman's rho) for**  
834 **significant eQTLs.** The significant eQTL are classified into *trans*, *cis*, and  
835 *chromo0*, then designated as up (positive slope) or down (negative slope) based  
836 on the correlation coefficients.

837

838 **Supplemental Table III. GO enrichment and *cis* or *trans* regulation of the 42**  
839 **identified modules.** All 42 distinct modules are listed with the total number of  
840 genes present in each module. The GO enrichment (if one is present) is given  
841 for each module, along with whether that module is predominantly *cis* or *trans*  
842 regulated. Only nine of the forty-two module show *trans* correlation, which  
843 includes the leaf development module.

844

845 **Supplemental Table IV. Leaf developmental phenotypes of selected ILs and**  
846 **genetic effects of eQTL (bin) on transcript levels of candidate genes.** Some  
847 of the ILs with strong leaf phenotypes are listed along with the associated

848 regulatory QTL (bin) that regulate the transcript levels of candidate leaf-  
849 developmental genes.

850

851 **Supplemental Table V. Significant correlations between transcript**  
852 **expression patterns and phenotypes.** Bootstrapping analyses correlated  
853 transcript expression patterns across the 74 ILs with three phenotypes in under  
854 both sun and shade treatments. Genes with significant correlations that also have  
855 eQTL are listed.

856

857 **Supplemental datasets:**

858 **Supplemental Dataset 1. List of Differentially Expressed Genes at the**  
859 **transcript level.** List of significant (FDR < 0.05) differentially expressed genes  
860 for each Introgression line (IL) compared to cultivated parent *Solanum*  
861 *lycopersicum* cv. M82. For each IL, gene ID, log Fold Change (logFC), log  
862 Counts Per Million (logCPM), P-value, False Discovery Rate (FDR) as well as  
863 annotation of the differentially expressed genes are presented. The differentially  
864 expressed genes for each IL are listed on separate sheets of the file as  
865 mentioned on the label of each sheet.

866

867 **Supplemental Dataset 2. Transgressive expression of genes at the**  
868 **transcript level among ILs.** Detailed results on transgressive transcript levels of



869 genes for the IL population is presented along with the relevant diagrams and  
870 enriched GO-categories for the genes showing transgressive transcript level.

871

872 **Supplemental Dataset 3. Genes with Transgressive transcript level.** List of  
873 the genes showing transgressive transcript level in the IL population along with  
874 details of their transcript abundance and annotation.

875

876 **Supplemental Dataset 4. . All genes with significant eQTL.** Gene locations  
877 are specified by columns: chromosome, bin, binIL.code1-4, begin, end, and  
878 sort.order. eQTL bin locations are specified by columns: cor.bin, cor.bin.ILcode1-  
879 4, and bin.order. eQTL statistics are in columns: slope.rho.spearman,  
880 pvalue.spearman, BHpvalue.spearman, up.down, and cis.trans. AGI and ITAG  
881 annotations are listed for the genes in columns V-Y.

882

883 **Supplemental Dataset 5. Number of eQTL and genes per bin.** Numbers of  
884 *trans*-, *cis*-, and *chromo0*-eQTL are reported for each bin and per gene within  
885 each bin.

886

887 **Supplemental Dataset 6. Number of eQTL and the bin on which those eQTL**  
888 **reside for each of the landmark modules and Leaf Development**  
889 **module.** The Photosynthesis, Defense, Cysteine-Type Peptidase Activity and  
890 Leaf Development modules are listed with the bins on which their eQTL reside.

891 The number eQTL per bin and the percentage of total eQTL within each module  
892 are listed.

893

894 **Supplemental Dataset 7. Photosynthesis module gene list.** Gene ID of all  
895 genes within the Photosynthesis module with description.

896

897 **Supplemental Dataset 8. Defense module gene list.** Gene ID of all genes  
898 within the Defense, Metabolism and Signaling module with description.

899

900 **Supplemental Dataset 9. Cysteine-type module gene list.** Gene ID of all  
901 genes within the Cysteine-type Peptidase module with description.

902

903 **Supplemental Dataset 10. GO Enrichment for DE Genes.** Enriched GO and  
904 GOslim categories for the genes with increased and decreased transcript levels  
905 in each IL compared to cultivated parent *Solanum lycopersicum* cv. M82.

906

907 **Supplemental Dataset 11. GO Enrichment for eQTL.** Enriched GO and  
908 GOslim categories for all the eQTL mapped to a bin, as well as the *cis*- and  
909 *trans*-eQTL separately.

910

911 **Supplemental Dataset 12. Promoter Motif Enrichment for DE Genes.**

912 Enriched promoter motifs with no mismatch for the up- and down-regulated  
913 genes in each IL compared to cultivated parent *Solanum lycopersicum* cv. M82  
914 are shown along with the p-value for significance.

915

916 **Supplemental Dataset 13. Promoter Motif Enrichment for *trans*-eQTL.** eQTL  
917 are grouped by bin (cor.bin) and promoters were analyzed for both zero and one  
918 mismatch with p-values for each. Bins can be ordered using the column,  
919 bin.order.

920

921 **Supplemental Dataset 14. Differentially expressed leaf Developmental**  
922 **Genes at the transcript level.** Frequency of differentially expressed literature-  
923 curated leaf-developmental genes among the ILs. Genes that show differential  
924 transcript level in at least one IL are listed. Genes, chromosomes, annotation and  
925 the number of ILs showing differential transcript level of the genes are listed

926

927 **Supplemental Dataset 15. Curated list of leaf developmental genes with**  
928 **eQTLs.** Gene locations are specified by columns: chromosome, bin, binIL.code1-  
929 4, begin, and end. eQTL bin locations are specified by columns: cor.bin, and  
930 cor.bin.ILcode1-4. eQTL statistics are in columns: slope.rho.spearman,  
931 pvalue.spearman, BHpvalue.spearman, up.down, and cis.trans. AGI annotations  
932 for the genes are in columns: Arabidopsis\_orthologue and Gene\_name.

933 **Supplemental Dataset 16. Literature-curated plus list of leaf development**  
934 **genes present in the leaf development modules.** Nineteen genes from the  
935 literature-curated plus list (Ichihashi et al., 2014) were present within the leaf  
936 development module, representing approximately 3% of the curated genes and  
937 11% of the curated genes found in the eQTL data set. The Gene ID, *Arabidopsis*  
938 orthologue, and a description for each gene is provided.

939

940 **Supplemental Dataset 17. Literature-curated plus list of leaf development**  
941 **genes that are present in all modules.** A total of 175 genes from the curated  
942 list plus of leaf developmental genes (Ichihashi et al., 2014) were present in the  
943 5,289 genes with significant eQTL. Matching gene number is the number of  
944 genes in the module, which were found in the curated list. The percent of curated  
945 genes defines the percentage of matched genes in a module out of the total  
946 curated list plus. The percent total in eQTL represents the percentage of matched  
947 genes in a module out of the 175 present only in the eQTL. The Photosynthesis  
948 and leaf development modules contain the highest proportion of leaf  
949 development curated genes.

950

951 **Supplemental Dataset 18. Leaf Development module gene list.** Gene ID of all  
952 genes within the Leaf Development module with description.

953

954 **Supplemental Dataset 19: GO enrichment for bins statistically enriched for**  
955 **transcripts expressed spatio-temporally across tissues.** Enriched GO and  
956 GOslim categories for all transcripts expressed spatio-temporally across tissues  
957 and with *trans*-eQTL residing in a bin.

958

959 **Supplemental Dataset 20: Leaf complexity phenotype of ILs.** Total leaf  
960 complexity data for all the ILs under simulated sun and shade is listed.

961

962 **Supplemental Dataset 21: Hypocotyl phenotype of ILs.** Hypocotyl length data  
963 for all the ILs under simulated sun and shade for two years is listed.

964

## 965 **Acknowledgments**

966 We thank Lauren R. Headland, Jason Kao and Paradee Thammapijai for help  
967 in generating plant materials. We also thank Mike Covington for his advice on  
968 bioinformatic analyses. We thank the Vincent J. Coates Genomics Sequencing  
969 Laboratory at UC Berkeley (supported by NIH S10 Instrumentation Grants  
970 S10RR029668 and S10RR027303), and computational resources/cyber  
971 infrastructure provided by the iPlant Collaborative ([www.iplantcollaborative.org](http://www.iplantcollaborative.org)),  
972 funded by the National Science Foundation (Grant DBI-0735191).

973

974 **Authors' contributions**

975 DHC, JNM and NRS conceived and designed the experiments. AR, DHC, RK,  
976 LC, YI and KZ performed the experiments. AR, JMB and SDR analyzed the data.  
977 AR, JMB, SDR, DHC and JNM contributed reagents/materials/analysis tools. AR,  
978 JMB, SDR and NRS wrote the paper. All authors read and approved the final  
979 manuscript.

980

981 **Figure legends:**

982 **Figure 1. Transcriptome profile of the tomato introgression lines.**

983 Differentially expressed genes at the transcript level for the ILs compared to  
984 cultivated parent M82. Y-axis shows all the tomato genes starting from the first  
985 gene on chromosome 1 to the last gene on chromosome 12, and X-axis depicts  
986 the individual ILs. Genes differentially expressed within the introgression regions  
987 (in *cis*) are shown as blue points and differentially expressed genes in *trans*  
988 (outside) the introgression region are shown as orange points.

989

990 **Figure 2. *Cis*- and *Trans*-eQTL plotted by bin across the 12 chromosomes**

991 **of *S. lycopersicum* cv. M82.** A) Stacked bar graph showing the sum of the  
992 number of eQTL mapping to each bin. B) Dotplot showing each eQTL arranged  
993 vertically by bin and horizontally by the location of the transcript abundance  
994 pattern it regulates. Bins with the largest numbers of *trans*-eQTL (4D, 4E, 4F, 6B,  
995 6C, 8A, 8B) are highlighted by green boxes. C) Map of chromosomes 4, 6, and 8

996 showing the overlapping IL regions, which define the bins (Modified from  
997 Chitwood et al., 2013). Bins with the largest numbers of *trans*-eQTL are indicated  
998 by green asterisks.

999

1000 **Figure 3. BH-SNE 2D mapping of eQTL.** A) Forty-two distinct modules  
1001 identified by DBscan from the mapping generated by BH-SNE analysis. B) The  
1002 three modules defined as landmark modules: photosynthesis, defense and  
1003 cysteine-type peptidase activity and the leaf development module's position  
1004 within the mapping. Modules are false colored.

1005

1006 **Figure 4. Connections between eQTL and the genes with correlated**  
1007 **transcript level.** Each plot includes the genes with eQTL that were clustered  
1008 together into a module based on transcript level patterns. A) Defense module. B)  
1009 Photosynthesis module. C) Cysteine peptidase module. D) Leaf development  
1010 module. I) The 12 tomato chromosomes in megabases. II) Colored boxes  
1011 indicate the sizes of each bin. III) Black bars indicate the locations of the genes.  
1012 IV) Chords connect eQTL to the genes whose transcript level patterns they  
1013 regulate. Chords are colored by the chromosome location of the eQTL.

1014

1015 **Figure 5. Median transcript level values for leaf development and**  
1016 **photosynthesis related modules and expression correlation.** A) The median  
1017 transcript level values of a module for each IL are shown. A consistent negative

1018 correlation between photosynthesis and Leaf development transcript expression  
1019 is evident across nearly all 74 ILs. Dashed lines indicate one significant deviation  
1020 from the module mean transcript level. Filled areas represent the median  
1021 transcript level of the leaf development module, while open areas indicate the  
1022 photosynthesis module median transcript levels. B) Leaf development median  
1023 transcript level versus photosynthesis median transcript level values for each IL  
1024 show a distinct negative correlation with an adjusted R-squared value of 0.77  
1025 (calculated by linear regression in R).

1026

1027 **Figure 6. Enriched gene transcript levels that are controlled by specific**  
1028 **bins.** A) Log fold change values (P1/SAM+P0) for previously identified  
1029 differentially expressed genes with high transcript levels in the SAM + P0  
1030 (magenta) vs. P1 (green). B) Scaled transcript level values for previously  
1031 identified differentially expressed genes with increasing (red) and decreasing  
1032 (blue) transcript levels over developmental time in the SAM + P0-P4. C) Scaled  
1033 expression values for previously identified genes with differential levels of  
1034 transcripts with increasing (orange) and decreasing (purple) transcript levels over  
1035 developmental time in P5. D) Transcripts (y-axis) and bins (x-axis) showing the  
1036 genetic regulation of transcript abundance (eQTL). Colors indicate SAM + P0  
1037 (magenta) and P1 (green) transcripts. Bins enriched for genetically regulating  
1038 genes with specific transcript expression patterns are indicated below with  
1039 triangles. E) Same as in D), except showing genes with increasing (red) and



1040 decreasing (blue) transcript levels over temporal time in the SAM + P0-P4. F)  
1041 Same as in D), except showing genes with increasing (orange) and decreasing  
1042 (purple) transcript levels over temporal time in P5. Previously determined  
1043 transcript abundance patterns are previously published (Chitwood et al., 2015).

1044

1045 **Figure 7. eQTL regulation of transcript abundance patterns that correlate**  
1046 **with hypocotyl length.**

1047 A) Forty-two distinct modules identified by DBscan from the eQTL mapping  
1048 generated by BH-SNE analysis. Modules enriched for genes with leaf  
1049 development and photosynthesis GO terms are labeled in blue and green,  
1050 respectively. Genes with transcript levels correlated with hypocotyl length under  
1051 simulated shade are indicated by squares with positive correlations in red and  
1052 negative correlations in yellow.

1053 B) Genes with transcript levels correlated with hypocotyl length under simulated  
1054 shade are shown connected to their respective eQTL with chords. I) The 12  
1055 tomato chromosomes in megabases. II) Colored boxes indicate the sizes of each  
1056 bin. III) Black bars indicate the locations of the genes. IV) Chords connect eQTL  
1057 to the genes whose transcript levels those eQTL regulate. Chords are colored by  
1058 the chromosome location of the eQTL.

1059

1060

1061

## References

- 1062  
1063  
1064 **Abe M, Katsumata H, Komeda Y, Takahashi T** (2003) Regulation of shoot  
1065 epidermal cell differentiation by a pair of homeodomain proteins in  
1066 Arabidopsis. *Development* **130**: 635-643
- 1067 **Abramoff MD, Magalhaes PJ, Ram SJ** (2004) Image Processing with ImageJ.  
1068 *Biophotonics International* **11**: 36-42
- 1069 **Benjamini Y, Hochberg Y** (1995) Controlling the false discovery rate: A practical  
1070 and powerful approach to multiple testing. *J R Stat Soc B* **57**: 289-300
- 1071 **Brem RB, Yvert G, Clinton R, Kruglyak L** (2002) Genetic dissection of  
1072 transcriptional regulation in budding yeast. *Science* **296**: 752-755
- 1073 **Bushati N, Smith J, Briscoe J, Watkins C** (2011) An intuitive graphical  
1074 visualization technique for the interrogation of transcriptome data. *Nucleic*  
1075 *Acids Res* **39**: 7380-7389
- 1076 **Carles CC, Choffnes-Inada D, Reville K, Lertpiriyapong K, Fletcher JC**  
1077 (2005) ULTRAPETALA1 encodes a SAND domain putative transcriptional  
1078 regulator that controls shoot and floral meristem activity in Arabidopsis.  
1079 *Development* **132**: 897-911
- 1080 **Chen X, Hackett CA, Niks RE, Hedley PE, Booth C, Druka A, Marcel TC, Vels**  
1081 **A, Bayer M, Milne I, Morris J, Ramsay L, Marshall D, Cardle L, Waugh**  
1082 **R** (2010) An eQTL analysis of partial resistance to Puccinia hordei in  
1083 barley. *PLoS One* **5**: e8598
- 1084 **Chitwood DH, Kumar R, Headland LR, Ranjan A, Covington MF, Ichihashi Y,**  
1085 **Fulop D, Jimenez-Gomez JM, Peng J, Maloof JN, Sinha NR** (2013) A  
1086 quantitative genetic basis for leaf morphology in a set of precisely defined  
1087 tomato introgression lines. *Plant Cell* **25**: 2465-2481
- 1088 **Chitwood DH, Kumar R, Ranjan A, Pelletier JM, Townsley BT, Ichihashi Y,**  
1089 **Martinez CC, Zumstein K, Harada JJ, Maloof JN, Sinha NR** (2015)  
1090 Light-Induced Indeterminacy Alters Shade-Avoiding Tomato Leaf  
1091 Morphology. *Plant Physiol* **169**: 2030-2047
- 1092 **Chitwood DH, Ranjan A, Kumar R, Ichihashi Y, Zumstein K, Headland LR,**  
1093 **Ostria-Gallardo E, Aguilar-Martinez JA, Bush S, Carriedo L, Fulop D,**  
1094 **Martinez CC, Peng J, Maloof JN, Sinha NR** (2014) Resolving distinct  
1095 genetic regulators of tomato leaf shape within a heteroblastic and  
1096 ontogenetic context. *Plant Cell* **26**: 3616-3629
- 1097 **Chitwood DH, Sinha NR** (2013) A census of cells in time: quantitative genetics  
1098 meets developmental biology. *Curr Opin Plant Biol* **16**: 92-99
- 1099 **Clark RM, Wagler TN, Quijada P, Doebley J** (2006) A distant upstream  
1100 enhancer at the maize domestication gene *tb1* has pleiotropic effects on  
1101 plant and inflorescent architecture. *Nat Genet* **38**: 594-597
- 1102 **Cnops G, Jover-Gil S, Peters JL, Neyt P, De Block S, Robles P, Ponce MR,**  
1103 **Gerats T, Micol JL, Van Lijsebettens M** (2004) The *rotunda2* mutants  
1104 identify a role for the *LEUNIG* gene in vegetative leaf morphogenesis. *J*  
1105 *Exp Bot* **55**: 1529-1539

- 1106 **Cubillos FA, Coustham V, Loudet O** (2012) Lessons from eQTL mapping  
1107 studies: non-coding regions and their role behind natural phenotypic  
1108 variation in plants. *Curr Opin Plant Biol* **15**: 192-198
- 1109 **DeCook R, Lall S, Nettleton D, Howell SH** (2006) Genetic regulation of gene  
1110 expression during shoot development in Arabidopsis. *Genetics* **172**: 1155-  
1111 1164
- 1112 **Diaz-Mendoza M, Velasco-Arroyo B, Gonzalez-Melendi P, Martinez M, Diaz I**  
1113 (2014) C1A cysteine protease-cystatin interactions in leaf senescence. *J*  
1114 *Exp Bot* **65**: 3825-3833
- 1115 **Druka A, Potokina E, Luo Z, Jiang N, Chen X, Kearsley M, Waugh R** (2010)  
1116 Expression quantitative trait loci analysis in plants. *Plant Biotechnol J* **8**:  
1117 10-27
- 1118 **Eshed Y, Zamir D** (1995) An introgression line population of *Lycopersicon*  
1119 *pennellii* in the cultivated tomato enables the identification and fine  
1120 mapping of yield-associated QTL. *Genetics* **141**: 1147-1162
- 1121 **Frary A, Nesbitt TC, Grandillo S, Knaap E, Cong B, Liu J, Meller J, Elber R,**  
1122 **Alpert KB, Tanksley SD** (2000) fw2.2: a quantitative trait locus key to the  
1123 evolution of tomato fruit size. *Science* **289**: 85-88
- 1124 **Fridman E, Carrari F, Liu YS, Fernie AR, Zamir D** (2004) Zooming in on a  
1125 quantitative trait for tomato yield using interspecific introgressions. *Science*  
1126 **305**: 1786-1789
- 1127 **Fukao T, Xu K, Ronald PC, Bailey-Serres J** (2006) A variable cluster of  
1128 ethylene response factor-like genes regulates metabolic and  
1129 developmental acclimation responses to submergence in rice. *Plant Cell*  
1130 **18**: 2021-2034
- 1131 **Fulop D, Ranjan A, Ofner I, Covington MF, Chitwood DH, West D, Ichihashi**  
1132 **Y, Headland L, Zamir D, Maloof JN, Sinha NR** (2016) A new advanced  
1133 backcross tomato population enables high resolution leaf QTL mapping  
1134 and gene identification. bioRxiv 040923; doi:  
1135 <http://dx.doi.org/10.1101/040923>
- 1136 **Goff SA, Vaughn M, McKay S, Lyons E, Stapleton AE, Gessler D, Matasci N,**  
1137 **Wang L, Hanlon M, Lenards A, Muir A, Merchant N, Lowry S, Mock S,**  
1138 **Helmke M, Kubach A, Narro M, Hopkins N, Micklos D, Hilgert U,**  
1139 **Gonzales M, Jordan C, Skidmore E, Dooley R, Cazes J, McLay R, Lu**  
1140 **Z, Pasternak S, Koesterke L, Piel WH, Grene R, Noutsos C, Gendler**  
1141 **K, Feng X, Tang C, Lent M, Kim SJ, Kvilekval K, Manjunath BS,**  
1142 **Tannen V, Stamatakis A, Sanderson M, Welch SM, Cranston KA,**  
1143 **Soltis P, Soltis D, O'Meara B, Ane C, Brutnell T, Kleibenstein DJ,**  
1144 **White JW, Leebens-Mack J, Donoghue MJ, Spalding EP, Vision TJ,**  
1145 **Myers CR, Lowenthal D, Enquist BJ, Boyle B, Akoglu A, Andrews G,**  
1146 **Ram S, Ware D, Stein L, Stanzione D** (2011) The iPlant Collaborative:  
1147 Cyberinfrastructure for Plant Biology. *Front Plant Sci* **2**: 34
- 1148 **Hammond JP, Mayes S, Bowen HC, Graham NS, Hayden RM, Love CG,**  
1149 **Spracklen WP, Wang J, Welham SJ, White PJ, King GJ, Broadley MR**

- 1150 (2011) Regulatory hotspots are associated with plant gene expression  
1151 under varying soil phosphorus supply in *Brassica rapa*. *Plant Physiol* **156**:  
1152 1230-1241
- 1153 **Hennig C** (2014) FPC: Flexible procedures for Clustering. R Package Version:  
1154 2.1-9
- 1155 **Holloway B, Li B** (2010) Expression QTLs: applications for crop improvement.  
1156 *Molecular Breeding* **26**: 381-391
- 1157 **Holtan HE, Hake S** (2003) Quantitative trait locus analysis of leaf dissection in  
1158 tomato using *Lycopersicon pennellii* segmental introgression lines.  
1159 *Genetics* **165**: 1541-1550
- 1160 **Ichihashi Y, Aguilar-Martinez JA, Farhi M, Chitwood DH, Kumar R, Millon**  
1161 **LV, Peng J, Maloof JN, Sinha NR** (2014) Evolutionary developmental  
1162 transcriptomics reveals a gene network module regulating interspecific  
1163 diversity in plant leaf shape. *Proc Natl Acad Sci U S A* **111**: E2616-2621
- 1164 **Jansen RC, Nap JP** (2001) Genetical genomics: the added value from  
1165 segregation. *Trends Genet* **17**: 388-391
- 1166 **Keurentjes JJ, Fu J, Terpstra IR, Garcia JM, van den Ackerveken G, Snoek**  
1167 **LB, Peeters AJ, Vreugdenhil D, Koornneef M, Jansen RC** (2007)  
1168 Regulatory network construction in *Arabidopsis* by using genome-wide  
1169 gene expression quantitative trait loci. *Proc Natl Acad Sci U S A* **104**:  
1170 1708-1713
- 1171 **Kliebenstein D** (2009) Quantitative genomics: analyzing intraspecific variation  
1172 using global gene expression polymorphisms or eQTLs. *Annu Rev Plant*  
1173 *Biol* **60**: 93-114
- 1174 **Kliebenstein DJ, West MA, van Leeuwen H, Kim K, Doerge RW, Michelmore**  
1175 **RW, St Clair DA** (2006) Genomic survey of gene expression diversity in  
1176 *Arabidopsis thaliana*. *Genetics* **172**: 1179-1189
- 1177 **Koenig D, Jimenez-Gomez JM, Kimura S, Fulop D, Chitwood DH, Headland**  
1178 **LR, Kumar R, Covington MF, Devisetty UK, Tat AV, Tohge T, Bolger**  
1179 **A, Schneeberger K, Ossowski S, Lanz C, Xiong G, Taylor-Teeple M,**  
1180 **Brady SM, Pauly M, Weigel D, Usadel B, Fernie AR, Peng J, Sinha NR,**  
1181 **Maloof JN** (2013) Comparative transcriptomics reveals patterns of  
1182 selection in domesticated and wild tomato. *Proc Natl Acad Sci U S A* **110**:  
1183 E2655-2662
- 1184 **Krijthe J** (2014) Rtsne: T-distributed Stochastic Neighbor Embedding using  
1185 Barnes-Hut implementation. R Package Version: 0.9
- 1186 **Kroymann J, Donnerhacke S, Schnabelrauch D, Mitchell-Olds T** (2003)  
1187 Evolutionary dynamics of an *Arabidopsis* insect resistance quantitative  
1188 trait locus. *Proc Natl Acad Sci U S A* **100 Suppl 2**: 14587-14592
- 1189 **Kumar R, Ichihashi Y, Kimura S, Chitwood DH, Headland LR, Peng J,**  
1190 **Maloof JN, Sinha NR** (2012) A High-Throughput Method for Illumina  
1191 RNA-Seq Library Preparation. *Front Plant Sci* **3**: 202
- 1192 **Li H, Durbin R** (2009) Fast and accurate short read alignment with Burrows-  
1193 Wheeler transform. *Bioinformatics* **25**: 1754-1760

- 1194 **Liu YS, Zamir D** (1999) Second generation *L. pennellii* introgression lines and  
1195 the concept of bin mapping. *Tomato Genet. Coop. Rep.* **49**: 26-30
- 1196 **Longair MH, Baker DA, Armstrong JD** (2011) Simple Neurite Tracer: open  
1197 source software for reconstruction, visualization and analysis of neuronal  
1198 processes. *Bioinformatics* **27**: 2453-2454
- 1199 **Moyle LC** (2008) Ecological and evolutionary genomics in the wild tomatoes  
1200 (*Solanum sect. Lycopersicon*). *Evolution* **62**: 2995-3013
- 1201 **Muir CD, Pease JB, Moyle LC** (2014) Quantitative genetic analysis indicates  
1202 natural selection on leaf phenotypes across wild tomato species (*Solanum*  
1203 *sect. Lycopersicon*; Solanaceae). *Genetics* **198**: 1629-1643
- 1204 **Muller NA, Wijnen CL, Srinivasan A, Ryngajlo M, Ofner I, Lin T, Ranjan A,**  
1205 **West D, Maloof JN, Sinha NR, Huang S, Zamir D, Jimenez-Gomez JM**  
1206 (2016) Domestication selected for deceleration of the circadian clock in  
1207 cultivated tomato. *Nat Genet* **48**: 89-93
- 1208 **R Development CoreTeam** (2015) R: A Language and Environment for  
1209 Statistical Computing. (Vienna, Austria: R Foundation for Statistical  
1210 Computing)
- 1211 **Ranjan A, Ichihashi Y, Sinha NR** (2012) The tomato genome: implications for  
1212 plant breeding, genomics and evolution. *Genome Biol* **13**: 167
- 1213 **Roberts A, Pachter L** (2013) Streaming fragment assignment for real-time  
1214 analysis of sequencing experiments. *Nat Methods* **10**: 71-73
- 1215 **Robinson MD, Oshlack A** (2010) A scaling normalization method for differential  
1216 expression analysis of RNA-seq data. *Genome Biol* **11**: R25
- 1217 **Schadt EE, Monks SA, Drake TA, Lusk AJ, Che N, Colinayo V, Ruff TG,**  
1218 **Milligan SB, Lamb JR, Cavet G, Linsley PS, Mao M, Stoughton RB,**  
1219 **Friend SH** (2003) Genetics of gene expression surveyed in maize, mouse  
1220 and man. *Nature* **422**: 297-302
- 1221 **Sharlach M, Dahlbeck D, Liu L, Chiu J, Jimenez-Gomez JM, Kimura S,**  
1222 **Koenig D, Maloof JN, Sinha N, Minsavage GV, Jones JB, Stall RE,**  
1223 **Staskawicz BJ** (2013) Fine genetic mapping of RXopJ4, a bacterial spot  
1224 disease resistance locus from *Solanum pennellii* LA716. *Theor Appl Genet*  
1225 **126**: 601-609
- 1226 **Svistonoff S, Creff A, Reymond M, Sigoillot-Claude C, Ricaud L, Blanchet**  
1227 **A, Nussaume L, Desnos T** (2007) Root tip contact with low-phosphate  
1228 media reprograms plant root architecture. *Nat Genet* **39**: 792-796
- 1229 **van der Maaten L** (2013) Barnes-Hut-SNE. arXiv:1301.3342[cs.LG]
- 1230 **van der Maaten L, Hinton G** (2008) Visualizing Data using t-SNE. *Journal of*  
1231 *Machine Learning Research* **9**: 2579-2605
- 1232 **Werner JD, Borevitz JO, Warthmann N, Trainer GT, Ecker JR, Chory J,**  
1233 **Weigel D** (2005) Quantitative trait locus mapping and DNA array  
1234 hybridization identify an FLM deletion as a cause for natural flowering-time  
1235 variation. *Proc Natl Acad Sci U S A* **102**: 2460-2465
- 1236 **West MA, Kim K, Kliebenstein DJ, van Leeuwen H, Michelmore RW, Doerge**  
1237 **RW, St Clair DA** (2007) Global eQTL mapping reveals the complex

- 1238 genetic architecture of transcript-level variation in Arabidopsis. *Genetics*  
1239 **175**: 1441-1450
- 1240 **Wickham H** (2009) *ggplot2: elegant graphics for data analysis*. Springer New  
1241 York
- 1242 **Young MD, Wakefield MJ, Smyth GK, Oshlack A** (2010) Gene ontology  
1243 analysis for RNA-seq: accounting for selection bias. *Genome Biol* **11**: R14
- 1244 **Yu D, Chen C, Chen Z** (2001) Evidence for an important role of WRKY DNA  
1245 binding proteins in the regulation of NPR1 gene expression. *Plant Cell* **13**:  
1246 1527-1540
- 1247 **Zhang L, Fetch T, Nirmala J, Schmierer D, Brueggeman R, Steffenson B,**  
1248 **Kleinhofs A** (2006) Rpr1, a gene required for Rpg1-dependent resistance  
1249 to stem rust in barley. *Theor Appl Genet* **113**: 847-855

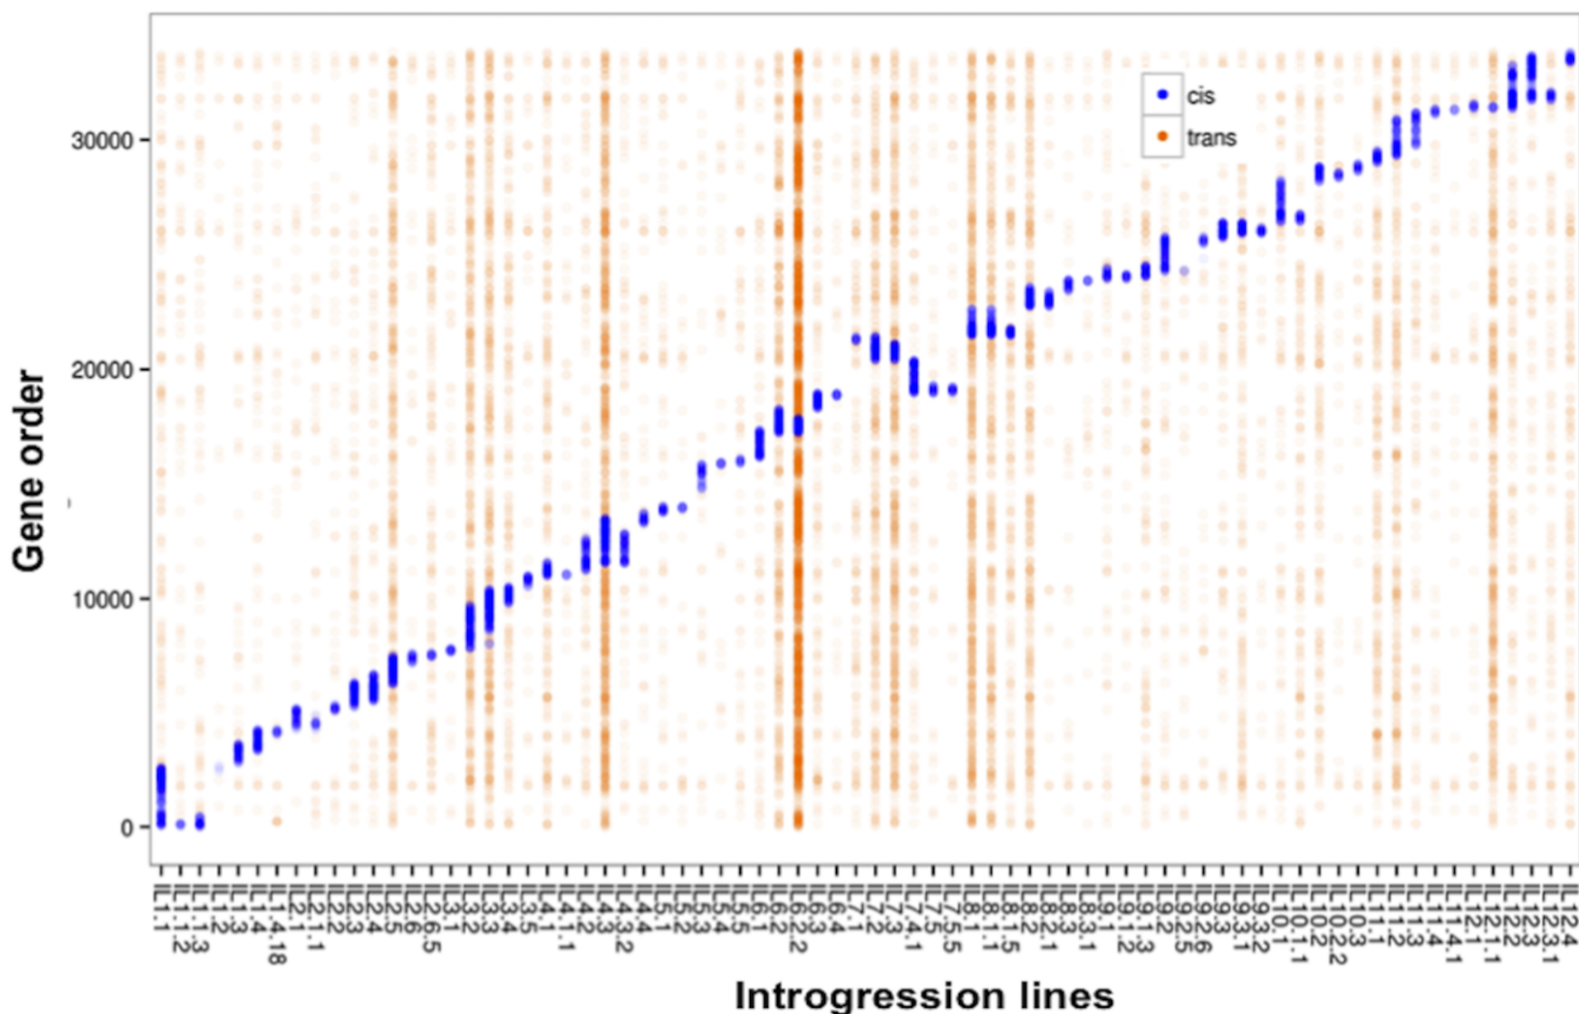

**Figure 1. Transcriptome profile of the tomato introgression lines.**

Differentially expressed genes at the transcript level for the ILs compared to cultivated parent M82. Y-axis shows all the tomato genes starting from the first gene on chromosome 1 to the last gene on chromosome 12, and X-axis depicts the individual ILs. Genes differentially expressed within the introgression regions (in *cis*) are shown as blue points and differentially expressed genes in *trans* (outside) the introgression region are shown as orange points.

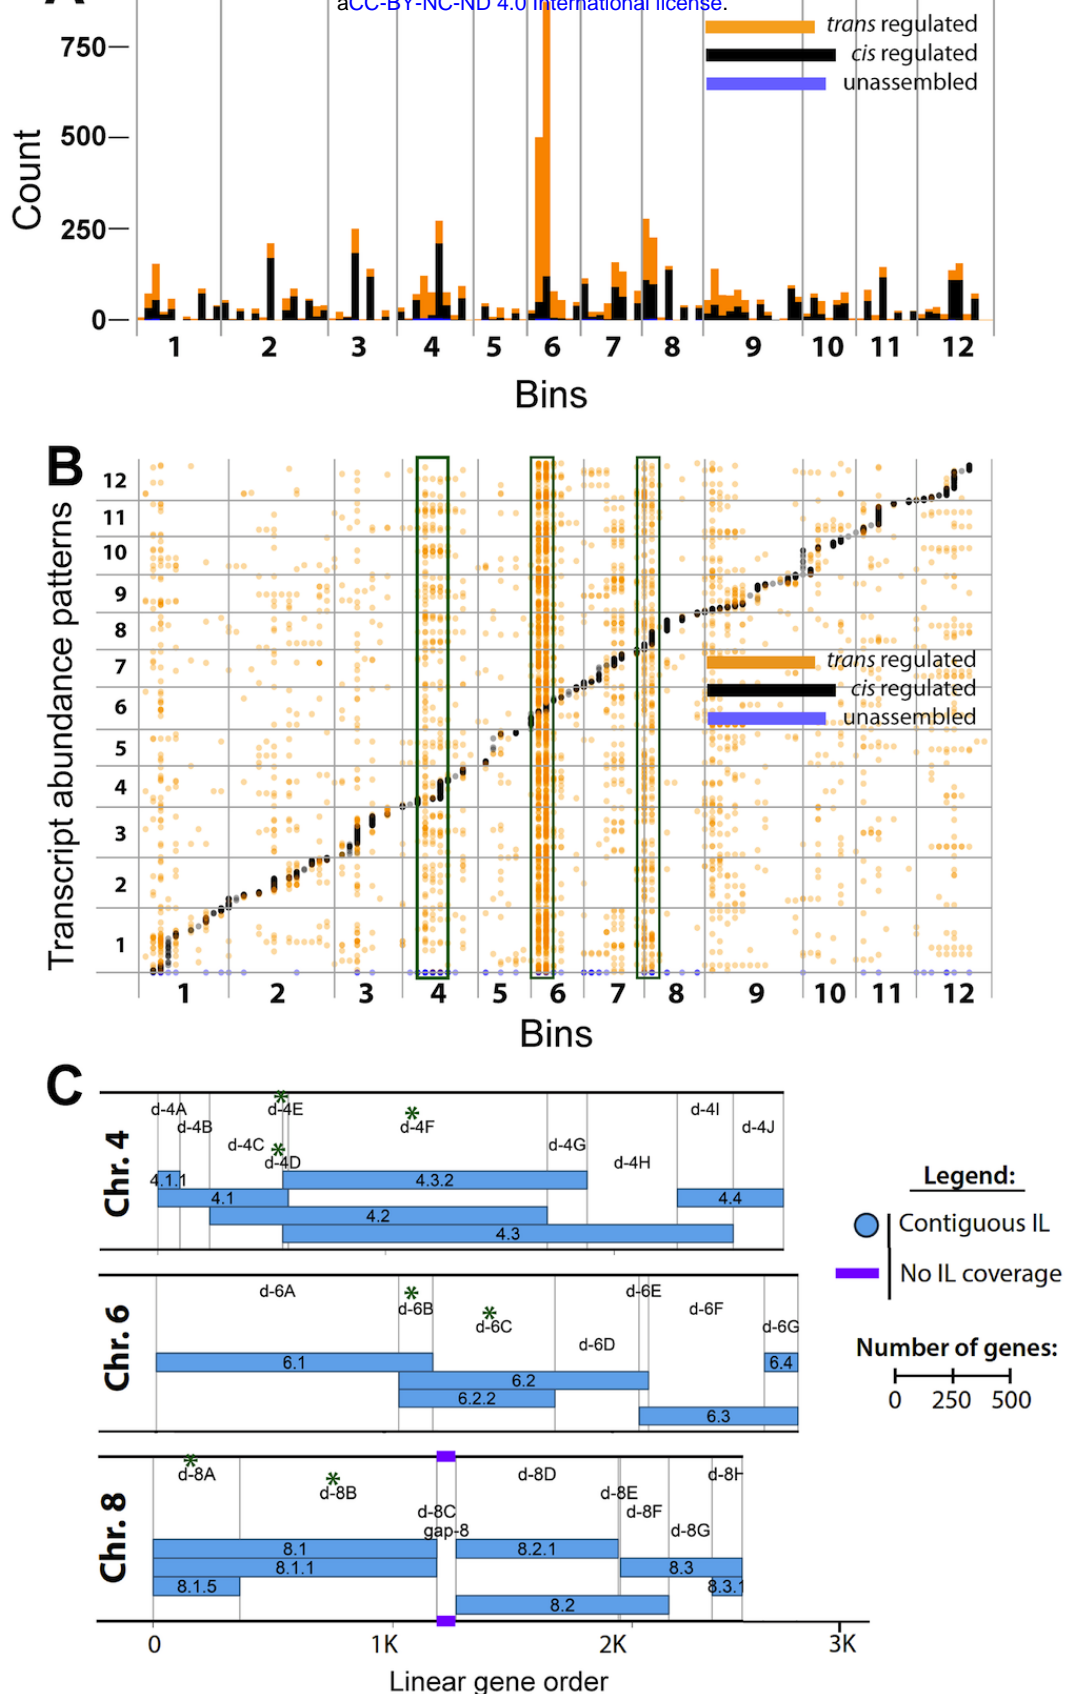

**Figure 2. Cis- and Trans-eQTL plotted by bin across the 12 chromosomes of *S. lycopersicum* cv. M82.** A) Stacked bar graph showing the sum of the number of eQTL mapping to each bin. B) Dotplot showing each eQTL arranged vertically by bin and horizontally by the location of the transcript abundance pattern it regulates. Bins with the largest numbers of *trans*-eQTL (4D, 4E, 4F, 6B, 6C, 8A, 8B) are highlighted by green boxes. C) Map of chromosomes 4, 6, and 8 showing the overlapping IL regions, which define the bins (Modified from Chitwood et al., 2013). Bins with the largest numbers of *trans*-eQTL are indicated by green asterisks.



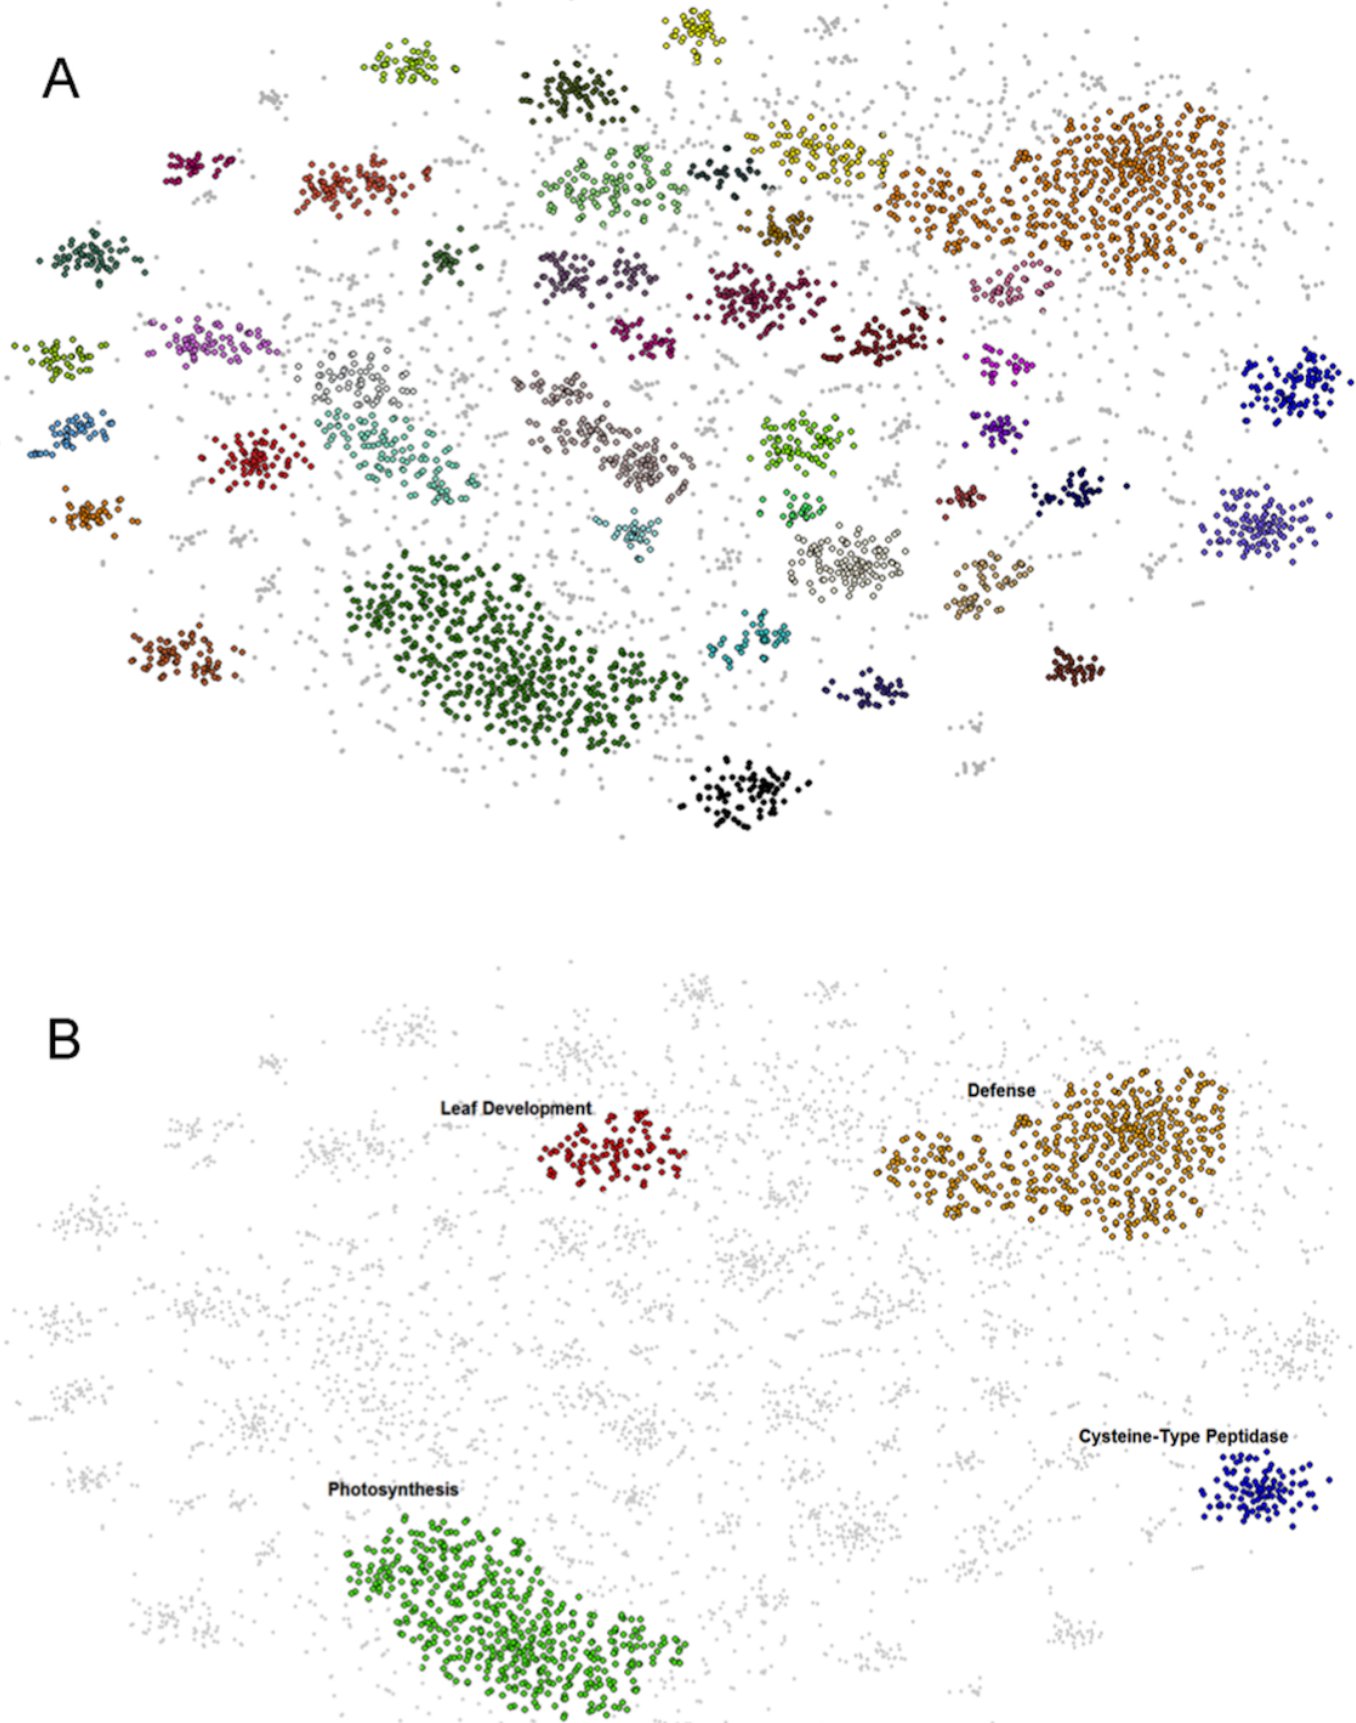

**Figure 3. BH-SNE 2D mapping of eQTL.** (A) Forty-two distinct modules identified by DBscan from the mapping generated by BH-SNE analysis. (B) The three modules defined as landmark modules: photosynthesis, defense and cysteine-type peptidase activity and the leaf development module's position within the mapping. Modules are false colored.

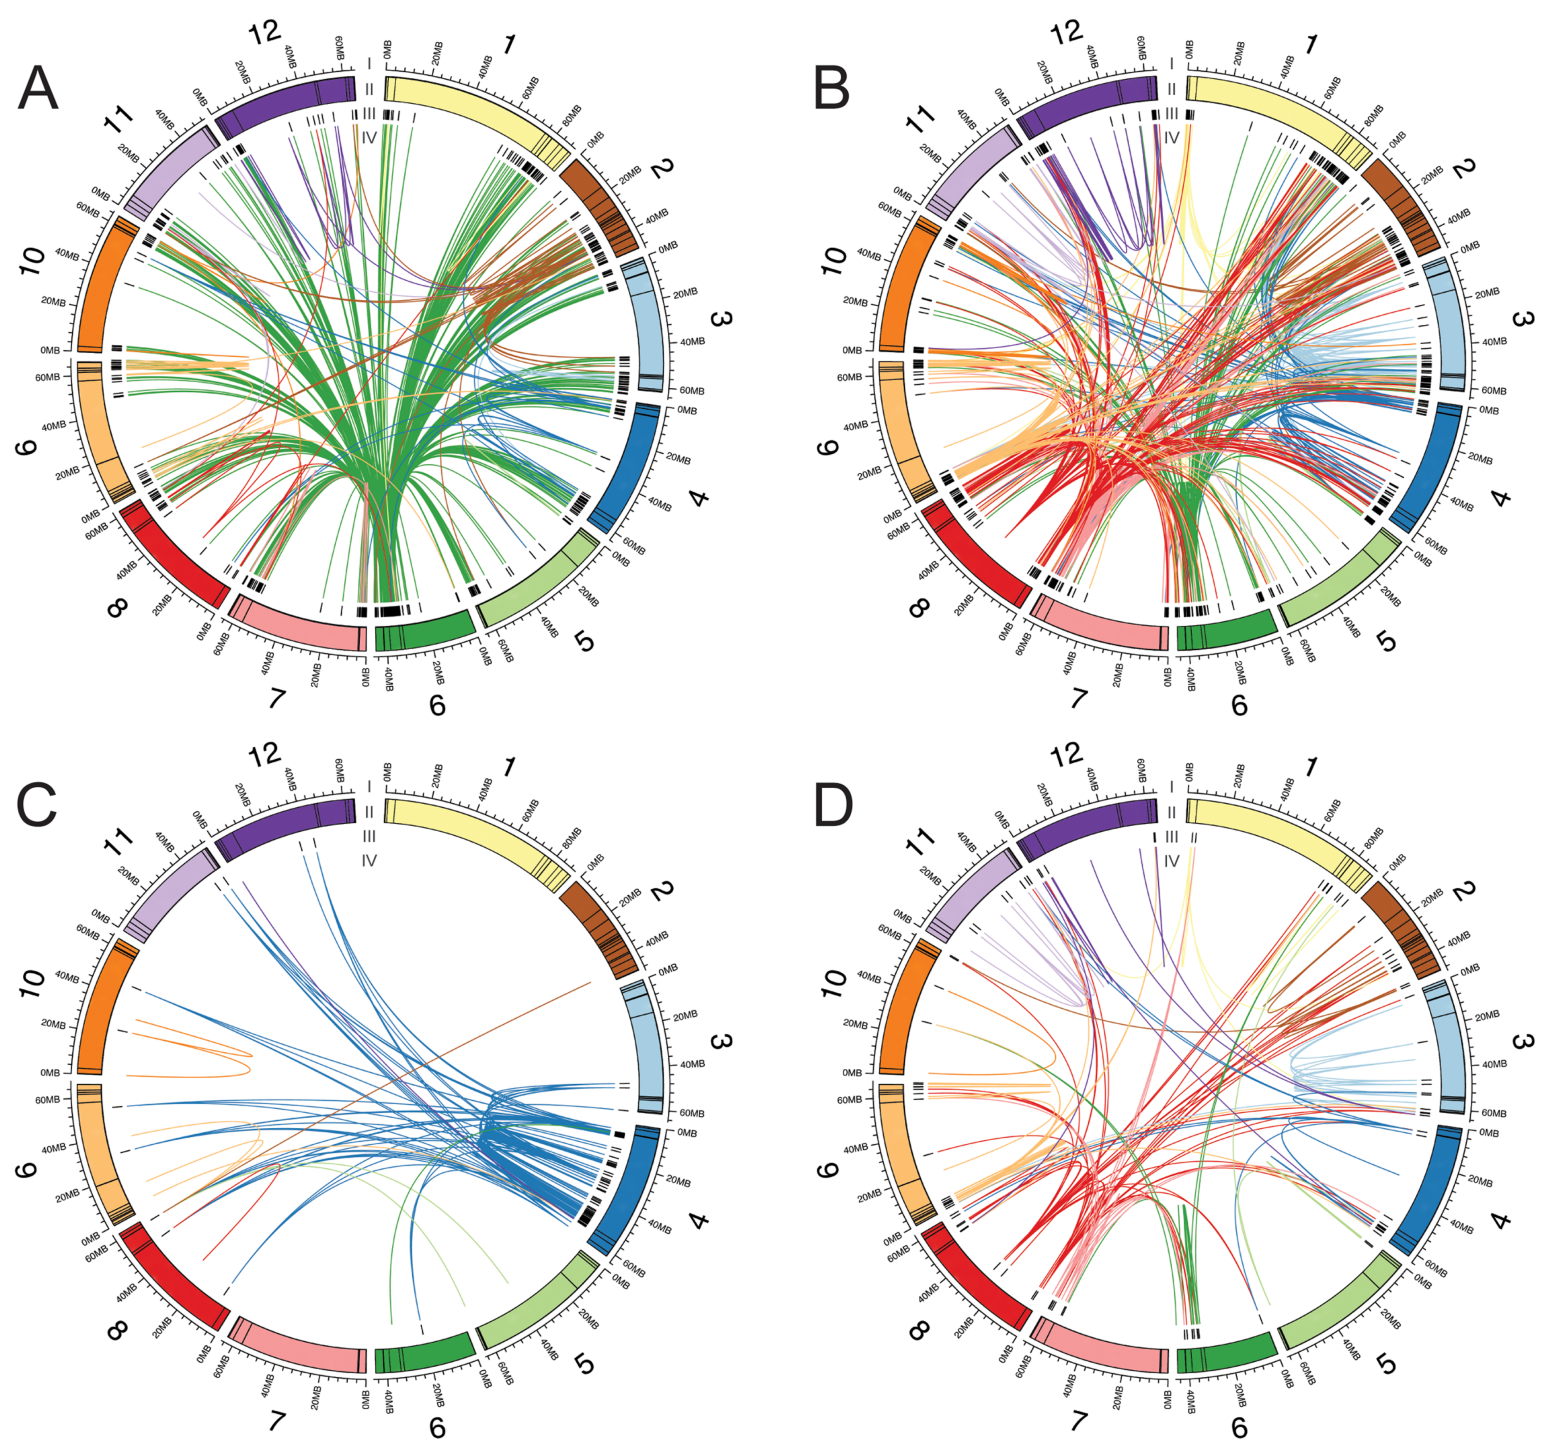

**Figure 4. Connections between eQTL and the genes with correlated transcript level.** Each plot includes the genes with eQTL that were clustered together into a module based on transcript level patterns. A) Defense module. B) Photosynthesis module. C) Cysteine peptidase module. D) Leaf development module. I) The 12 tomato chromosomes in megabases. II) Colored boxes indicate the sizes of each bin. III) Black bars indicate the locations of the genes. IV) Chords connect eQTL to the genes whose transcript level patterns they regulate. Chords are colored by the chromosome location of the eQTL.

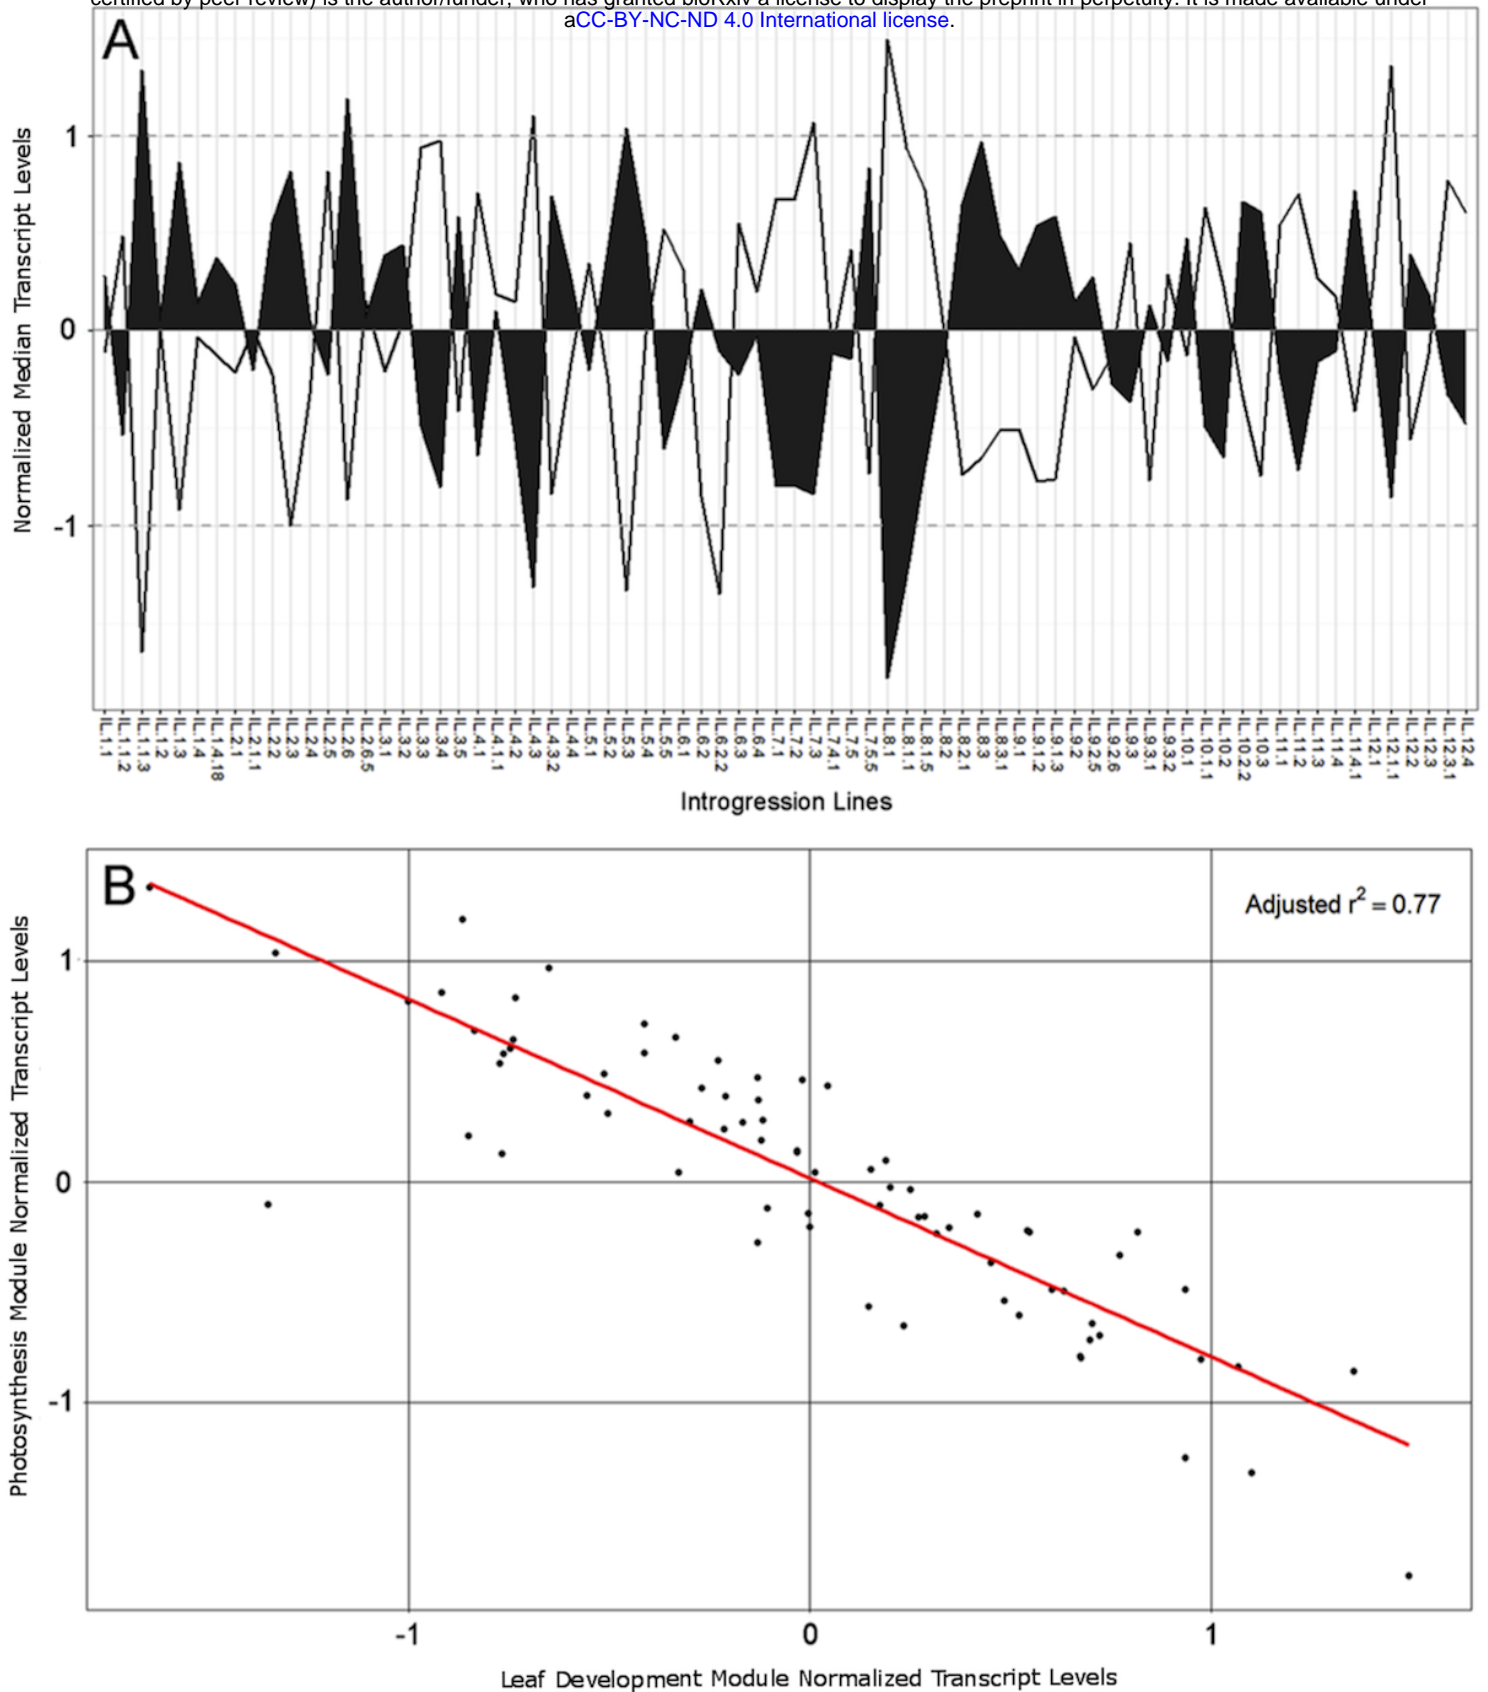

**Figure 5. Median transcript level values for leaf development and photosynthesis related modules and transcript level correlation.** A) The median transcript level values of a module for each IL are shown. A consistent negative correlation between photosynthesis and Leaf development transcript levels is evident across nearly all 74 ILs. Dashed lines indicate one significant deviation from the module mean transcript level. Filled areas represent the median transcript level of the leaf development module, while open areas indicate the photosynthesis module median transcript levels. B) Leaf development median transcript level versus photosynthesis median transcript level values for each IL show a distinct negative correlation with an adjusted R-squared value of 0.77 (calculated by linear regression in R).

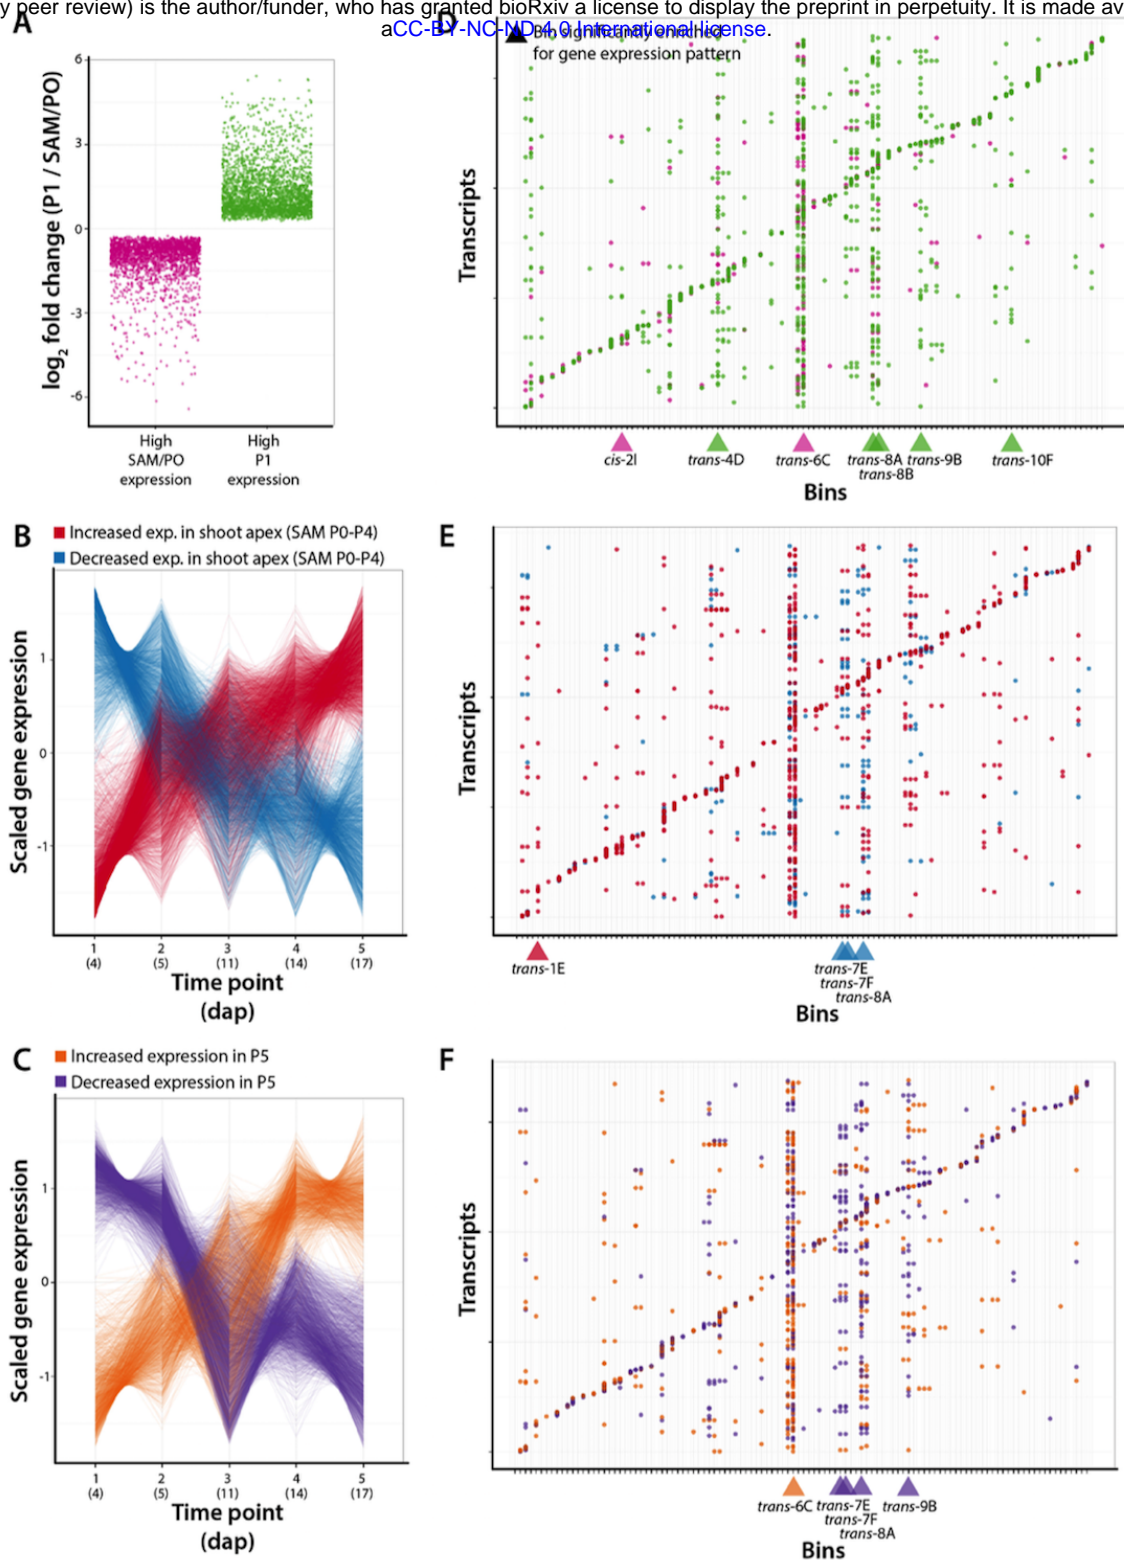

**Figure 6. Enriched gene transcript levels that are controlled by specific bins.**

A) Log fold change values (P1/SAM+P0) for previously identified differentially expressed genes with high transcript levels in the SAM + P0 (magenta) vs. P1 (green). B) Scaled transcript level values for previously identified differentially expressed genes with increasing (red) and decreasing (blue) transcript levels over developmental time in the SAM + P0-P4. C) Scaled expression values for previously identified genes with differential levels of transcripts with increasing (orange) and decreasing (purple) transcript levels over developmental time in P5. D) Transcripts (y-axis) and bins (x-axis) showing the genetic regulation of transcript abundance (eQTL). Colors indicate SAM + P0 (magenta) and P1 (green) transcripts. Bins enriched for genetically regulating genes with specific transcript expression patterns are indicated below with triangles. E) Same as in D), except showing genes with increasing (red) and decreasing (blue) transcript levels over temporal time in the SAM + P0-P4. F) Same as in D), except showing genes with increasing (orange) and decreasing (purple) transcript levels over temporal time in P5. Previously determined transcript abundance patterns are previously published (Chitwood et al., 2015).

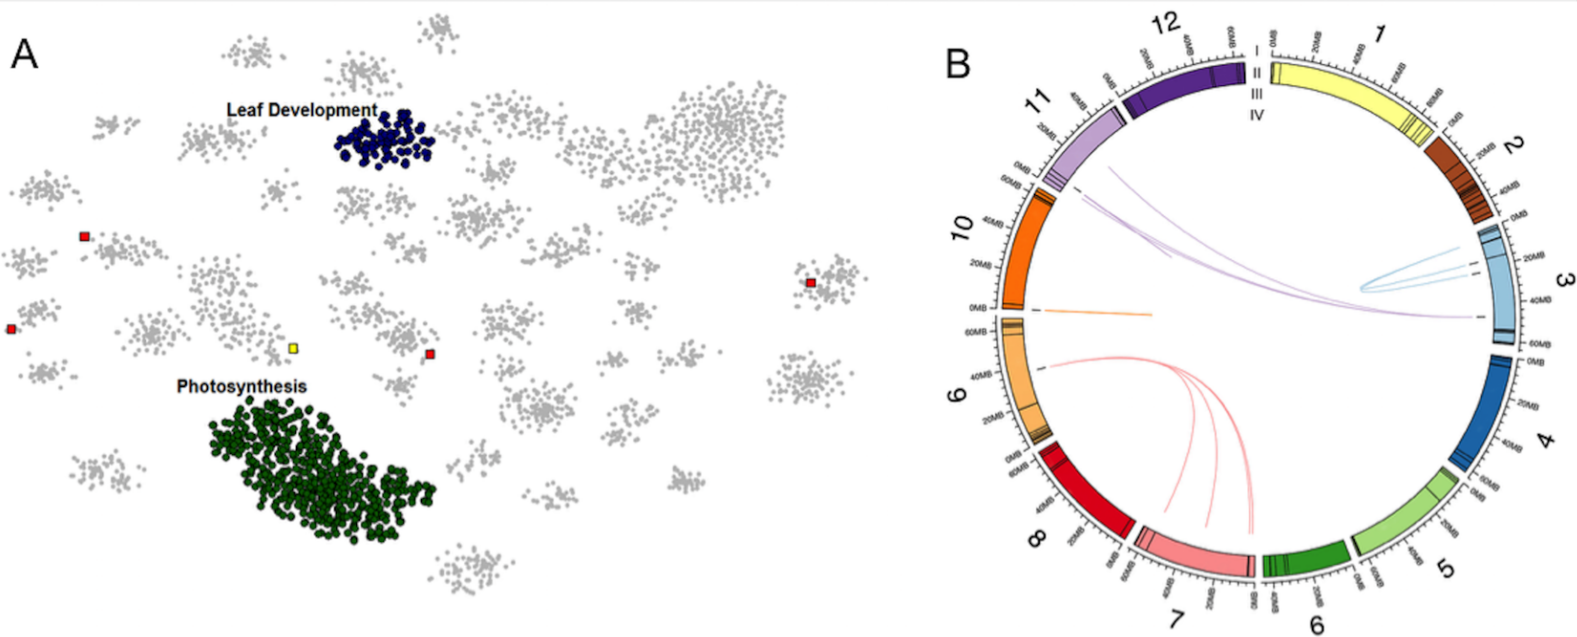

**Figure 7. eQTL regulation of transcript abundance patterns that correlate with hypocotyl length.**

A) Forty-two distinct modules identified by DBscan from the eQTL mapping generated by BH-SNE analysis. Modules enriched for genes with leaf development and photosynthesis GO terms are labeled in blue and green, respectively. Genes with transcript levels correlated with hypocotyl length under simulated shade are indicated by squares with positive correlations in red and negative correlations in yellow.

B) Genes with transcript levels correlated with hypocotyl length under simulated shade are shown connected to their respective eQTL with chords. I) The 12 tomato chromosomes in megabases. II) Colored boxes indicate the sizes of each bin. III) Black bars indicate the locations of the genes. IV) Chords connect eQTL to the genes whose transcript levels those eQTL regulate. Chords are colored by the chromosome location of the eQTL.

## Parsed Citations

bioRxiv preprint doi: <https://doi.org/10.1101/040592>; this version posted July 8, 2016. The copyright holder for this preprint (which was not certified by peer review) is the author/funder, who has granted bioRxiv a license to display the preprint in perpetuity. It is made available under aCC-BY-NC-ND 4.0 International license.

**Abe M, Katsumata H, Komeda Y, Takahashi T (2003) Regulation of shoot epidermal cell differentiation by a pair of homeodomain proteins in Arabidopsis. Development 130: 635-643**

Pubmed: [Author and Title](#)

CrossRef: [Author and Title](#)

Google Scholar: [Author Only](#) [Title Only](#) [Author and Title](#)

**Abramoff MD, Magalhaes PJ, Ram SJ (2004) Image Processing with ImageJ. Biophotonics International 11: 36-42**

Pubmed: [Author and Title](#)

CrossRef: [Author and Title](#)

Google Scholar: [Author Only](#) [Title Only](#) [Author and Title](#)

**Benjamini Y, Hochberg Y (1995) Controlling the false discovery rate: A practical and powerful approach to multiple testing. J R Stat Soc B 57: 289-300**

Pubmed: [Author and Title](#)

CrossRef: [Author and Title](#)

Google Scholar: [Author Only](#) [Title Only](#) [Author and Title](#)

**Brem RB, Yvert G, Clinton R, Kruglyak L (2002) Genetic dissection of transcriptional regulation in budding yeast. Science 296: 752-755**

Pubmed: [Author and Title](#)

CrossRef: [Author and Title](#)

Google Scholar: [Author Only](#) [Title Only](#) [Author and Title](#)

**Bushati N, Smith J, Briscoe J, Watkins C (2011) An intuitive graphical visualization technique for the interrogation of transcriptome data. Nucleic Acids Res 39: 7380-7389**

Pubmed: [Author and Title](#)

CrossRef: [Author and Title](#)

Google Scholar: [Author Only](#) [Title Only](#) [Author and Title](#)

**Carles CC, Choffnes-Inada D, Reville K, Lertpiriyapong K, Fletcher JC (2005) ULTRAPETALA1 encodes a SAND domain putative transcriptional regulator that controls shoot and floral meristem activity in Arabidopsis. Development 132: 897-911**

Pubmed: [Author and Title](#)

CrossRef: [Author and Title](#)

Google Scholar: [Author Only](#) [Title Only](#) [Author and Title](#)

**Chen X, Hackett CA, Niks RE, Hedley PE, Booth C, Druka A, Marcel TC, Vels A, Bayer M, Milne I, Morris J, Ramsay L, Marshall D, Cardle L, Waugh R (2010) An eQTL analysis of partial resistance to Puccinia hordei in barley. PLoS One 5: e8598**

Pubmed: [Author and Title](#)

CrossRef: [Author and Title](#)

Google Scholar: [Author Only](#) [Title Only](#) [Author and Title](#)

**Chitwood DH, Kumar R, Headland LR, Ranjan A, Covington MF, Ichihashi Y, Fulop D, Jimenez-Gomez JM, Peng J, Maloof JN, Sinha NR (2013) A quantitative genetic basis for leaf morphology in a set of precisely defined tomato introgression lines. Plant Cell 25: 2465-2481**

Pubmed: [Author and Title](#)

CrossRef: [Author and Title](#)

Google Scholar: [Author Only](#) [Title Only](#) [Author and Title](#)

**Chitwood DH, Kumar R, Ranjan A, Pelletier JM, Townsley BT, Ichihashi Y, Martinez CC, Zumstein K, Harada JJ, Maloof JN, Sinha NR (2015) Light-Induced Indeterminacy Alters Shade-Avoiding Tomato Leaf Morphology. Plant Physiol 169: 2030-2047**

Pubmed: [Author and Title](#)

CrossRef: [Author and Title](#)

Google Scholar: [Author Only](#) [Title Only](#) [Author and Title](#)

**Chitwood DH, Ranjan A, Kumar R, Ichihashi Y, Zumstein K, Headland LR, Ostria-Gallardo E, Aguilar-Martinez JA, Bush S, Carriedo L, Fulop D, Martinez CC, Peng J, Maloof JN, Sinha NR (2014) Resolving distinct genetic regulators of tomato leaf shape within a heteroblastic and ontogenetic context. Plant Cell 26: 3616-3629**

Pubmed: [Author and Title](#)

CrossRef: [Author and Title](#)

Google Scholar: [Author Only](#) [Title Only](#) [Author and Title](#)

**Chitwood DH, Sinha NR (2013) A census of cells in time: quantitative genetics meets developmental biology. Curr Opin Plant Biol 16: 92-99**

Pubmed: [Author and Title](#)

CrossRef: [Author and Title](#)

Google Scholar: [Author Only](#) [Title Only](#) [Author and Title](#)

**Clark RM, Wagler TN, Quijada P, Doebley J (2006) A distant upstream enhancer at the maize domestication gene tb1 has pleiotropic effects on plant and inflorescent architecture. Nat Genet 38: 594-597**

Pubmed: [Author and Title](#)

CrossRef: [Author and Title](#)

Google Scholar: [Author Only](#) [Title Only](#) [Author and Title](#)

**Cnops G, Jover-Gil S, Peters JL, Neyt P, De Block S, Robles P, Ponce MR, Gerats T, Micol JL, Van Lijsebettens M (2004) The rotunda2 mutants identify a role for the LEUNIG gene in vegetative leaf morphogenesis. J Exp Bot 55: 1529-1539**

Pubmed: [Author and Title](#)

CrossRef: [Author and Title](#)

Google Scholar: [Author Only](#) [Title Only](#) [Author and Title](#)

**Cubillos FA, Coustham V, Loudet O (2012) Lessons from eQTL mapping studies: non-coding regions and their role behind natural phenotypic variation in plants. *Curr Opin Plant Biol* 15: 192-198**  
bioRxiv preprint doi: <https://doi.org/10.1101/049592>; this version posted July 8, 2016. The copyright holder for this preprint (which was not certified by peer review) is the author/funder, who has granted bioRxiv a license to display the preprint in perpetuity. It is made available under aCC-BY-NC-ND 4.0 International license.

Pubmed: [Author and Title](#)

CrossRef: [Author and Title](#)

Google Scholar: [Author Only](#) [Title Only](#) [Author and Title](#)

**DeCook R, Lall S, Nettleton D, Howell SH (2006) Genetic regulation of gene expression during shoot development in Arabidopsis. *Genetics* 172: 1155-1164**

Pubmed: [Author and Title](#)

CrossRef: [Author and Title](#)

Google Scholar: [Author Only](#) [Title Only](#) [Author and Title](#)

**Diaz-Mendoza M, Velasco-Arroyo B, Gonzalez-Melendi P, Martinez M, Diaz I (2014) C1A cysteine protease-cystatin interactions in leaf senescence. *J Exp Bot* 65: 3825-3833**

Pubmed: [Author and Title](#)

CrossRef: [Author and Title](#)

Google Scholar: [Author Only](#) [Title Only](#) [Author and Title](#)

**Druka A, Potokina E, Luo Z, Jiang N, Chen X, Kearsley M, Waugh R (2010) Expression quantitative trait loci analysis in plants. *Plant Biotechnol J* 8: 10-27**

Pubmed: [Author and Title](#)

CrossRef: [Author and Title](#)

Google Scholar: [Author Only](#) [Title Only](#) [Author and Title](#)

**Eshed Y, Zamir D (1995) An introgression line population of *Lycopersicon pennellii* in the cultivated tomato enables the identification and fine mapping of yield-associated QTL. *Genetics* 141: 1147-1162**

Pubmed: [Author and Title](#)

CrossRef: [Author and Title](#)

Google Scholar: [Author Only](#) [Title Only](#) [Author and Title](#)

**Frary A, Nesbitt TC, Grandillo S, Knaap E, Cong B, Liu J, Meller J, Elber R, Alpert KB, Tanksley SD (2000) fw2.2: a quantitative trait locus key to the evolution of tomato fruit size. *Science* 289: 85-88**

Pubmed: [Author and Title](#)

CrossRef: [Author and Title](#)

Google Scholar: [Author Only](#) [Title Only](#) [Author and Title](#)

**Fridman E, Carrari F, Liu YS, Fernie AR, Zamir D (2004) Zooming in on a quantitative trait for tomato yield using interspecific introgressions. *Science* 305: 1786-1789**

Pubmed: [Author and Title](#)

CrossRef: [Author and Title](#)

Google Scholar: [Author Only](#) [Title Only](#) [Author and Title](#)

**Fukao T, Xu K, Ronald PC, Bailey-Serres J (2006) A variable cluster of ethylene response factor-like genes regulates metabolic and developmental acclimation responses to submergence in rice. *Plant Cell* 18: 2021-2034**

Pubmed: [Author and Title](#)

CrossRef: [Author and Title](#)

Google Scholar: [Author Only](#) [Title Only](#) [Author and Title](#)

**Fulop D, Ranjan A, Ofner I, Covington MF, Chitwood DH, West D, Ichihashi Y, Headland L, Zamir D, Maloof JN, Sinha NR (2016) A new advanced backcross tomato population enables high resolution leaf QTL mapping and gene identification. *bioRxiv* 040923; doi: <http://dx.doi.org/10.1101/040923>**

Pubmed: [Author and Title](#)

CrossRef: [Author and Title](#)

Google Scholar: [Author Only](#) [Title Only](#) [Author and Title](#)

**Goff SA, Vaughn M, McKay S, Lyons E, Stapleton AE, Gessler D, Matasci N, Wang L, Hanlon M, Lenards A, Muir A, Merchant N, Lowry S, Mock S, Helmke M, Kubach A, Narro M, Hopkins N, Micklos D, Hilgert U, Gonzales M, Jordan C, Skidmore E, Dooley R, Cazes J, McLay R, Lu Z, Pasternak S, Koesterke L, Piel WH, Grene R, Noutsos C, Gendler K, Feng X, Tang C, Lent M, Kim SJ, Kvilekval K, Manjunath BS, Tannen V, Stamatakis A, Sanderson M, Welch SM, Cranston KA, Soltis P, Soltis D, O'Meara B, Ane C, Brutnell T, Kleibenstein DJ, White JW, Leebens-Mack J, Donoghue MJ, Spalding EP, Vision TJ, Myers CR, Lowenthal D, Enquist BJ, Boyle B, Akoglu A, Andrews G, Ram S, Ware D, Stein L, Stanzione D (2011) The iPlant Collaborative: Cyberinfrastructure for Plant Biology. *Front Plant Sci* 2: 34**

Pubmed: [Author and Title](#)

CrossRef: [Author and Title](#)

Google Scholar: [Author Only](#) [Title Only](#) [Author and Title](#)

**Hammond JP, Mayes S, Bowen HC, Graham NS, Hayden RM, Love CG, Spracklen WP, Wang J, Welham SJ, White PJ, King GJ, Broadley MR (2011) Regulatory hotspots are associated with plant gene expression under varying soil phosphorus supply in *Brassica rapa*. *Plant Physiol* 156: 1230-1241**

Pubmed: [Author and Title](#)

CrossRef: [Author and Title](#)

Google Scholar: [Author Only](#) [Title Only](#) [Author and Title](#)

**Hennig C (2014) FPC: Flexible procedures for Clustering. R Package Version: 2.1-9**

Pubmed: [Author and Title](#)

CrossRef: [Author and Title](#)

Google Scholar: [Author Only](#) [Title Only](#) [Author and Title](#)

**Holloway B, Li B (2010) Expression QTLs: applications for crop improvement. Molecular Breeding 26: 381-391**

Pubmed: [Author and Title](#)

CrossRef: [Author and Title](#)

Google Scholar: [Author Only Title Only Author and Title](#)  
bioRxiv preprint doi: <https://doi.org/10.1101/040592>; this version posted July 8, 2016. The copyright holder for this preprint (which was not certified by peer review) is the author/funder, who has granted bioRxiv a license to display the preprint in perpetuity. It is made available under aCC-BY-NC-ND 4.0 International license.

**Holtan HE, Hake S (2003) Quantitative trait locus analysis of leaf dissection in tomato using Lycopersicon pennellii segmental introgression lines. Genetics 165: 1541-1550**

Pubmed: [Author and Title](#)

CrossRef: [Author and Title](#)

Google Scholar: [Author Only Title Only Author and Title](#)

**Ichihashi Y, Aguilar-Martinez JA, Farhi M, Chitwood DH, Kumar R, Millon LV, Peng J, Maloof JN, Sinha NR (2014) Evolutionary developmental transcriptomics reveals a gene network module regulating interspecific diversity in plant leaf shape. Proc Natl Acad Sci U S A 111: E2616-2621**

Pubmed: [Author and Title](#)

CrossRef: [Author and Title](#)

Google Scholar: [Author Only Title Only Author and Title](#)

**Jansen RC, Nap JP (2001) Genetical genomics: the added value from segregation. Trends Genet 17: 388-391**

Pubmed: [Author and Title](#)

CrossRef: [Author and Title](#)

Google Scholar: [Author Only Title Only Author and Title](#)

**Keurentjes JJ, Fu J, Terpstra IR, Garcia JM, van den Ackerveken G, Snoek LB, Peeters AJ, Vreugdenhil D, Koornneef M, Jansen RC (2007) Regulatory network construction in Arabidopsis by using genome-wide gene expression quantitative trait loci. Proc Natl Acad Sci U S A 104: 1708-1713**

Pubmed: [Author and Title](#)

CrossRef: [Author and Title](#)

Google Scholar: [Author Only Title Only Author and Title](#)

**Kliebenstein D (2009) Quantitative genomics: analyzing intraspecific variation using global gene expression polymorphisms or eQTLs. Annu Rev Plant Biol 60: 93-114**

Pubmed: [Author and Title](#)

CrossRef: [Author and Title](#)

Google Scholar: [Author Only Title Only Author and Title](#)

**Kliebenstein DJ, West MA, van Leeuwen H, Kim K, Doerge RW, Michelmore RW, St Clair DA (2006) Genomic survey of gene expression diversity in Arabidopsis thaliana. Genetics 172: 1179-1189**

Pubmed: [Author and Title](#)

CrossRef: [Author and Title](#)

Google Scholar: [Author Only Title Only Author and Title](#)

**Koenig D, Jimenez-Gomez JM, Kimura S, Fulop D, Chitwood DH, Headland LR, Kumar R, Covington MF, Devisetty UK, Tat AV, Tohge T, Bolger A, Schneeberger K, Ossowski S, Lanz C, Xiong G, Taylor-Teeple M, Brady SM, Pauly M, Weigel D, Usadel B, Fernie AR, Peng J, Sinha NR, Maloof JN (2013) Comparative transcriptomics reveals patterns of selection in domesticated and wild tomato. Proc Natl Acad Sci U S A 110: E2655-2662**

Pubmed: [Author and Title](#)

CrossRef: [Author and Title](#)

Google Scholar: [Author Only Title Only Author and Title](#)

**Krijthe J (2014) Rtsne: T-distributed Stochastic Neighbor Embedding using Barnes-Hut implementation. R Package Version: 0.9**

Pubmed: [Author and Title](#)

CrossRef: [Author and Title](#)

Google Scholar: [Author Only Title Only Author and Title](#)

**Kroymann J, Donnerhacke S, Schnabelrauch D, Mitchell-Olds T (2003) Evolutionary dynamics of an Arabidopsis insect resistance quantitative trait locus. Proc Natl Acad Sci U S A 100 Suppl 2: 14587-14592**

Pubmed: [Author and Title](#)

CrossRef: [Author and Title](#)

Google Scholar: [Author Only Title Only Author and Title](#)

**Kumar R, Ichihashi Y, Kimura S, Chitwood DH, Headland LR, Peng J, Maloof JN, Sinha NR (2012) A High-Throughput Method for Illumina RNA-Seq Library Preparation. Front Plant Sci 3: 202**

Pubmed: [Author and Title](#)

CrossRef: [Author and Title](#)

Google Scholar: [Author Only Title Only Author and Title](#)

**Li H, Durbin R (2009) Fast and accurate short read alignment with Burrows-Wheeler transform. Bioinformatics 25: 1754-1760**

Pubmed: [Author and Title](#)

CrossRef: [Author and Title](#)

Google Scholar: [Author Only Title Only Author and Title](#)

**Liu YS, Zamir D (1999) Second generation L. pennellii introgression lines and the concept of bin mapping. Tomato Genet. Coop. Rep. 49: 26-30**

Pubmed: [Author and Title](#)

CrossRef: [Author and Title](#)

Google Scholar: [Author Only Title Only Author and Title](#)

**Longair MH, Baker DA, Armstrong JD (2011) Simple Neurite Tracer: open source software for reconstruction, visualization and analysis of neuronal processes. Bioinformatics 27: 2453-2454**



Pubmed: [Author and Title](#)

CrossRef: [Author and Title](#)

Google Scholar: [Author Only Title Only Author and Title](#)

bioRxiv preprint doi: <https://doi.org/10.1101/040592>; this version posted July 8, 2016. The copyright holder for this preprint (which was not certified by peer review) is the author/funder, who has granted bioRxiv a license to display the preprint in perpetuity. It is made available under aCC-BY-NC-ND 4.0 International license.

**Moyle LC (2008) Ecological and evolutionary genomics of the wild tomatoes (Solanum sect. Lycopersicon). Evolution 62: 295-303**

Pubmed: [Author and Title](#)

CrossRef: [Author and Title](#)

Google Scholar: [Author Only Title Only Author and Title](#)

**Muir CD, Pease JB, Moyle LC (2014) Quantitative genetic analysis indicates natural selection on leaf phenotypes across wild tomato species (Solanum sect. Lycopersicon; Solanaceae). Genetics 198: 1629-1643**

Pubmed: [Author and Title](#)

CrossRef: [Author and Title](#)

Google Scholar: [Author Only Title Only Author and Title](#)

**Muller NA, Wijnen CL, Srinivasan A, Ryngajlo M, Ofner I, Lin T, Ranjan A, West D, Maloof JN, Sinha NR, Huang S, Zamir D, Jimenez-Gomez JM (2016) Domestication selected for deceleration of the circadian clock in cultivated tomato. Nat Genet 48: 89-93**

Pubmed: [Author and Title](#)

CrossRef: [Author and Title](#)

Google Scholar: [Author Only Title Only Author and Title](#)

**R Development CoreTeam (2015) R: A Language and Environment for Statistical Computing. (Vienna, Austria: R Foundation for Statistical Computing)**

Pubmed: [Author and Title](#)

CrossRef: [Author and Title](#)

Google Scholar: [Author Only Title Only Author and Title](#)

**Ranjan A, Ichihashi Y, Sinha NR (2012) The tomato genome: implications for plant breeding, genomics and evolution. Genome Biol 13: 167**

Pubmed: [Author and Title](#)

CrossRef: [Author and Title](#)

Google Scholar: [Author Only Title Only Author and Title](#)

**Roberts A, Pachter L (2013) Streaming fragment assignment for real-time analysis of sequencing experiments. Nat Methods 10: 71-73**

Pubmed: [Author and Title](#)

CrossRef: [Author and Title](#)

Google Scholar: [Author Only Title Only Author and Title](#)

**Robinson MD, Oshlack A (2010) A scaling normalization method for differential expression analysis of RNA-seq data. Genome Biol 11: R25**

Pubmed: [Author and Title](#)

CrossRef: [Author and Title](#)

Google Scholar: [Author Only Title Only Author and Title](#)

**Schadt EE, Monks SA, Drake TA, Lusk AJ, Che N, Colinayo V, Ruff TG, Milligan SB, Lamb JR, Cavet G, Linsley PS, Mao M, Stoughton RB, Friend SH (2003) Genetics of gene expression surveyed in maize, mouse and man. Nature 422: 297-302**

Pubmed: [Author and Title](#)

CrossRef: [Author and Title](#)

Google Scholar: [Author Only Title Only Author and Title](#)

**Sharlach M, Dahlbeck D, Liu L, Chiu J, Jimenez-Gomez JM, Kimura S, Koenig D, Maloof JN, Sinha N, Minsavage GV, Jones JB, Stall RE, Staskawicz BJ (2013) Fine genetic mapping of RXopJ4, a bacterial spot disease resistance locus from Solanum pennellii LA716. Theor Appl Genet 126: 601-609**

Pubmed: [Author and Title](#)

CrossRef: [Author and Title](#)

Google Scholar: [Author Only Title Only Author and Title](#)

**Svistonoff S, Creff A, Reymond M, Sigoillot-Claude C, Ricaud L, Blanchet A, Nussaume L, Desnos T (2007) Root tip contact with low-phosphate media reprograms plant root architecture. Nat Genet 39: 792-796**

Pubmed: [Author and Title](#)

CrossRef: [Author and Title](#)

Google Scholar: [Author Only Title Only Author and Title](#)

**van der Maaten L (2013) Barnes-Hut-SNE. arXiv:1301.3342[cs.LG]**

Pubmed: [Author and Title](#)

CrossRef: [Author and Title](#)

Google Scholar: [Author Only Title Only Author and Title](#)

**van der Maaten L, Hinton G (2008) Visualizing Data using t-SNE. Journal of Machine Learning Research 9: 2579-2605**

Pubmed: [Author and Title](#)

CrossRef: [Author and Title](#)

Google Scholar: [Author Only Title Only Author and Title](#)

**Werner JD, Borevitz JO, Warthmann N, Trainer GT, Ecker JR, Chory J, Weigel D (2005) Quantitative trait locus mapping and DNA array hybridization identify an FLM deletion as a cause for natural flowering-time variation. Proc Natl Acad Sci U S A 102: 2460-2465**

Pubmed: [Author and Title](#)

CrossRef: [Author and Title](#)

Google Scholar: [Author Only Title Only Author and Title](#)

**West MA, Kim K, Kliebenstein DJ, van Leeuwen H, Michelmore RW, Doerge RW, St Clair DA (2007) Global eQTL mapping reveals**

**the complex genetic architecture of transcript-level variation in Arabidopsis. Genetics 175: 1441-1450**

Pubmed: [Author and Title](#)

CrossRef: [Author and Title](#)

Google Scholar: [Author Only](#) [Title Only](#) [Author and Title](#)  
bioRxiv preprint doi: <https://doi.org/10.1101/040592>; this version posted July 8, 2016. The copyright holder for this preprint (which was not certified by peer review) is the author/funder, who has granted bioRxiv a license to display the preprint in perpetuity. It is made available under aCC-BY-NC-ND 4.0 International license.

**Wickham H (2009) ggplot2: elegant graphics for data analysis. Springer New York**

Pubmed: [Author and Title](#)

CrossRef: [Author and Title](#)

Google Scholar: [Author Only](#) [Title Only](#) [Author and Title](#)

**Young MD, Wakefield MJ, Smyth GK, Oshlack A (2010) Gene ontology analysis for RNA-seq: accounting for selection bias. Genome Biol 11: R14**

Pubmed: [Author and Title](#)

CrossRef: [Author and Title](#)

Google Scholar: [Author Only](#) [Title Only](#) [Author and Title](#)

**Yu D, Chen C, Chen Z (2001) Evidence for an important role of WRKY DNA binding proteins in the regulation of NPR1 gene expression. Plant Cell 13: 1527-1540**

Pubmed: [Author and Title](#)

CrossRef: [Author and Title](#)

Google Scholar: [Author Only](#) [Title Only](#) [Author and Title](#)

**Zhang L, Fetch T, Nirmala J, Schmierer D, Brueggeman R, Steffenson B, Kleinhofs A (2006) Rpr1, a gene required for Rpg1-dependent resistance to stem rust in barley. Theor Appl Genet 113: 847-855**

Pubmed: [Author and Title](#)

CrossRef: [Author and Title](#)

Google Scholar: [Author Only](#) [Title Only](#) [Author and Title](#)
